# Supplementary material for: Early bird or night owl? Controlling the ultrafast photodynamics of triphenylamine substituted 2,2′:6′,2′′-terpyridine
Source: Royal Society of Chemistry journal article supplement (doi:10.1039/d3cp04492k), 2024-01-01
Supplement: d3cp04492k1.pdf [file d3cp04492k1.pdf]

## Early bird or night owl? Controlling the ultrafast photodynamics of triphenylamine substituted 2,2':6',2''-terpyridine

---

Anna Maria Maroń, Oliviero Cannelli, Etienne Christophe Socie, Malte Oppermann, Piotr Lodowski, Barbara Machura, Majed Chergui

### Electronic Supporting Information

#### Synthetic procedure and identification of tBuTPAterpy from [1]:

A mixture of 4'-(4-bromophenyl)-2,2':6',2''-terpyridine (1.72 g, 4.44 mmol), bis(4-tert-butylphenyl)amine (1.5 g, 5.33 mmol), Pd(OAc)<sub>2</sub> (40 mg, 0.18 mmol, 4%-mol), P(<sup>t</sup>Bu)<sub>3</sub> (73 mg, 0.36 mmol, 8%-mol) and NaO<sup>t</sup>Bu (770 mg, 8 mmol) in 100 mL of anhydrous toluene was heated under reflux for 24 h under argon atmosphere. After this time, the mixture was cooled to room temperature, water (60 mL) was added, and the mixture was stirred for 20 minutes. Then, the mixture was extracted with dichloromethane (30 mL) three times. The combined organic extract was washed with brine and dried with anhydrous Na<sub>2</sub>SO<sub>4</sub>. The solvent was removed by a rotary evaporator under vacuum. The crude product was purified by column chromatography (silica gel, AcOEt/*n*-hexane/NH<sub>3</sub>·H<sub>2</sub>O 75:50:1 v/v) and recrystallized from ethanol, to give **tBuTPAterpy** as a yellow solid (1.64 g, 63%). <sup>1</sup>H NMR (400 MHz, CDCl<sub>3</sub>) δ 8.73 – 8.71 (m, 4H), 8.66 (d, *J* = 7.8 Hz, 2H), 7.87 (t, *J* = 7.7 Hz, 2H), 7.77 (d, *J* = 8.5 Hz, 2H), 7.36 – 7.28 (m, 6H), 7.15 (d, *J* = 8.5 Hz, 2H), 7.09 (d, *J* = 8.4 Hz, 4H), 1.34 (s, 18H). <sup>13</sup>C NMR (100 MHz, CDCl<sub>3</sub>) δ 156.54, 155.91, 149.88, 149.24, 149.19, 146.34, 144.77, 136.84, 131.03, 128.04, 126.27, 124.55, 123.76, 122.38, 121.38, 118.28, 34.45, 31.57. C<sub>41</sub>H<sub>40</sub>N<sub>4</sub> (588.79 g/mol) calculated: C, 83.64; H, 6.85; N, 9.52%. Found: C, 83.64; H, 6.95; N, 9.58%.

## Stability, photostability and fluence dependence

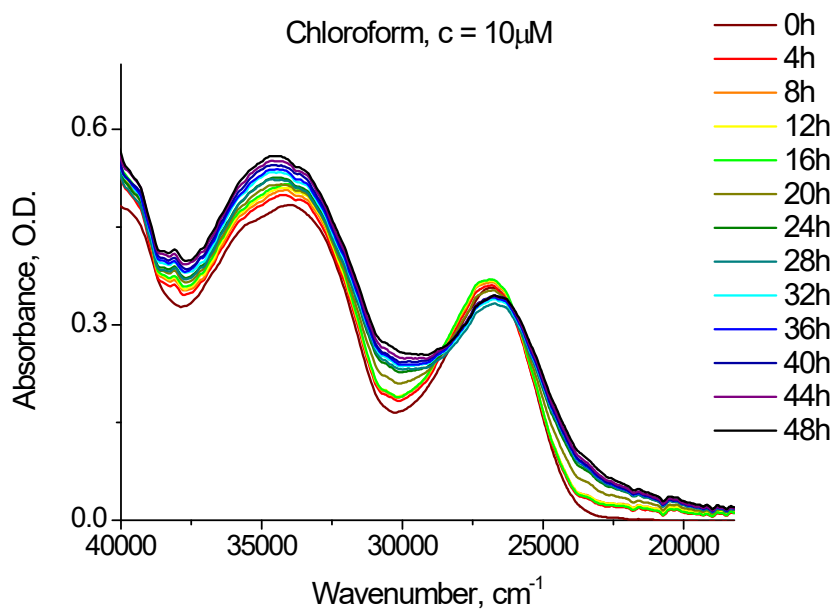

a

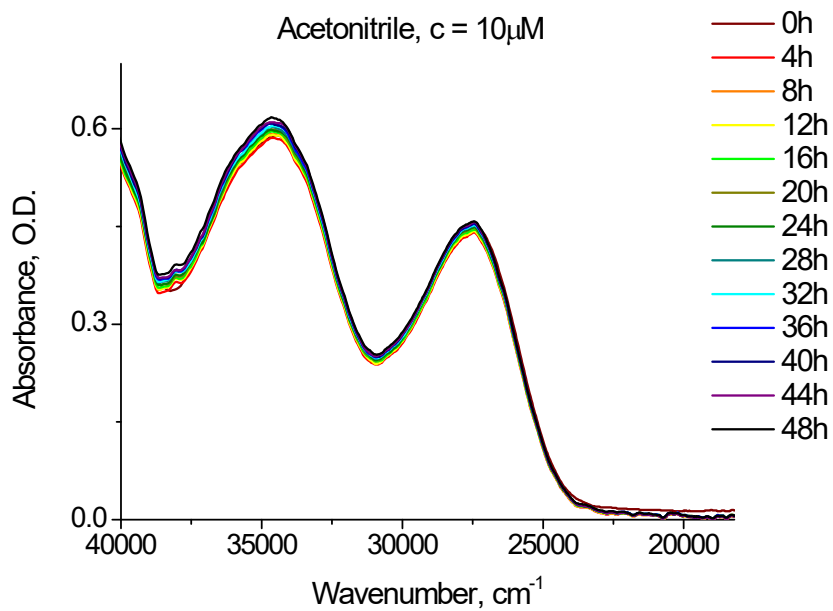

b

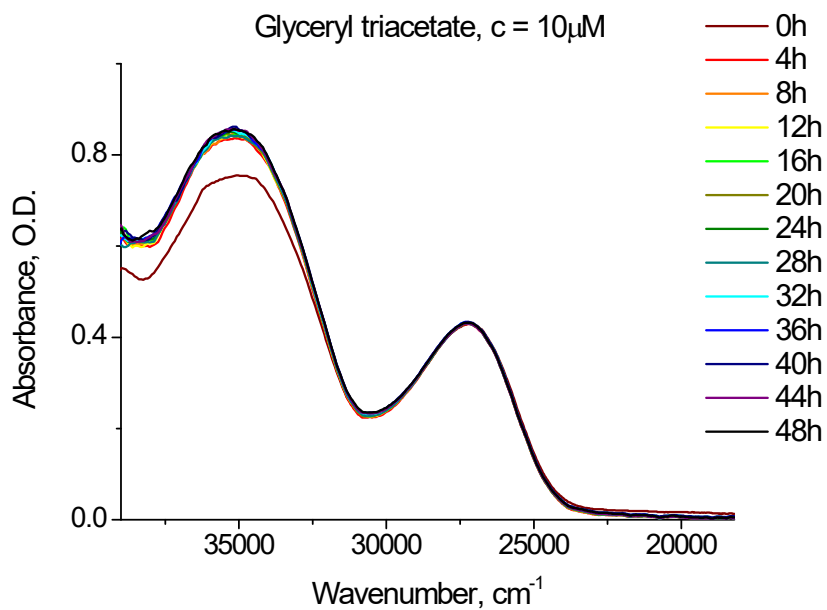

c

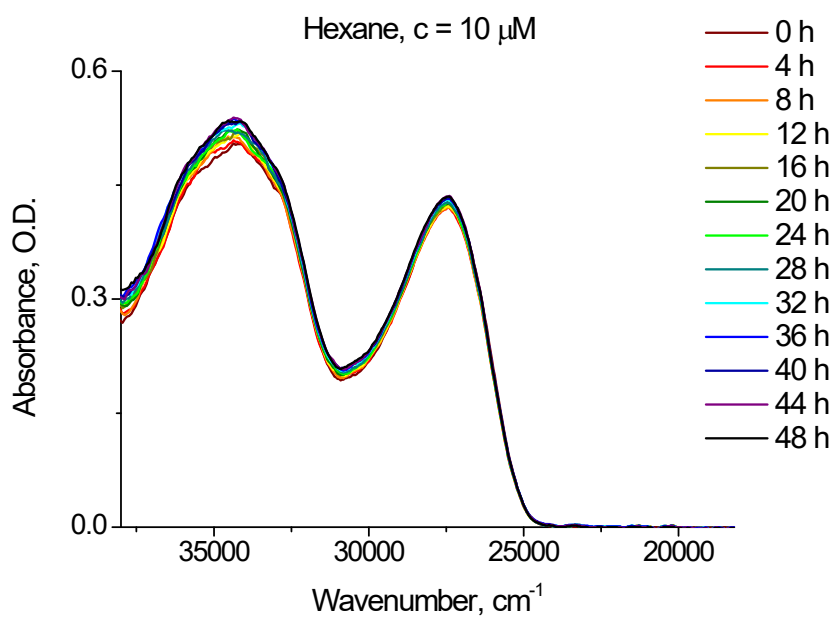

d

**Figure S1.** Ageing experiments for **tBuTPAterpy** in chloroform (a), acetonitrile (b), glyceryl triacetate (c), hexane (d).

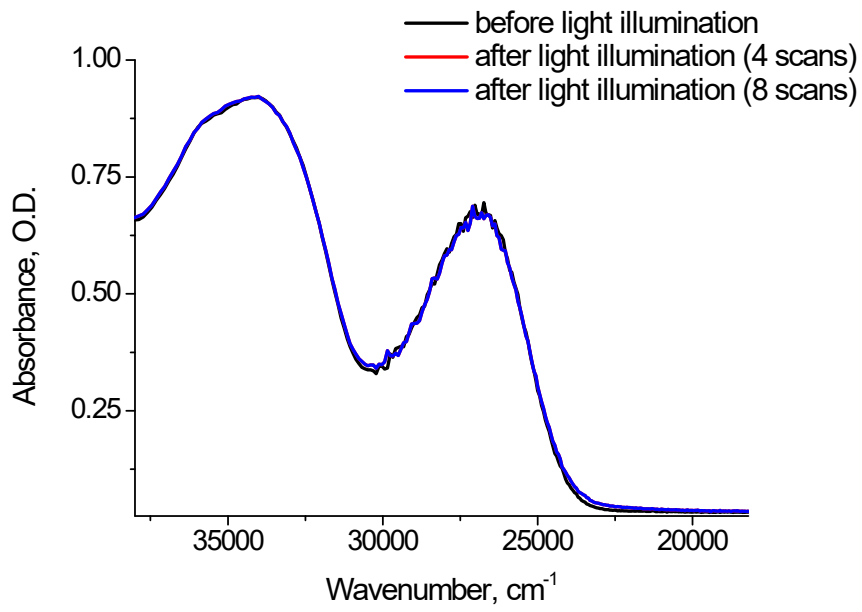

a

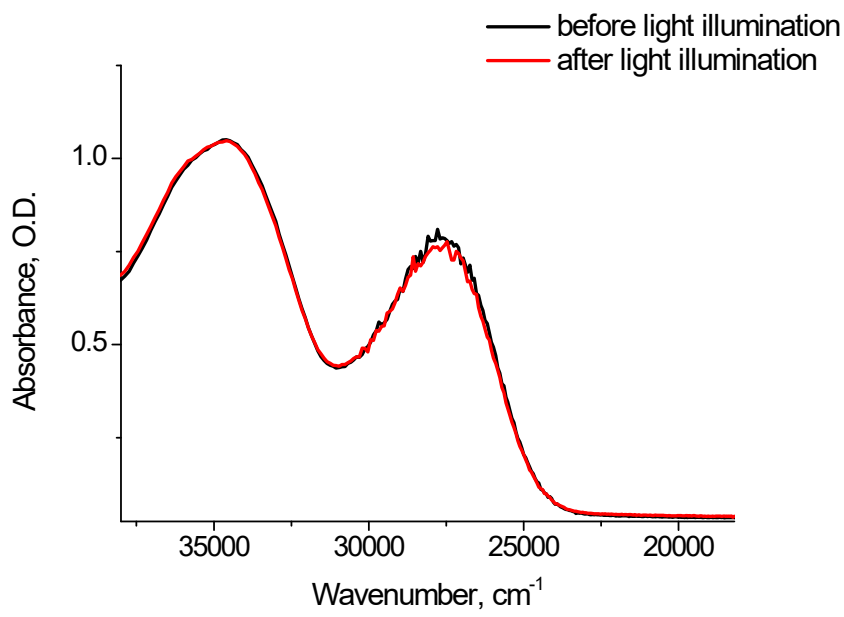

b

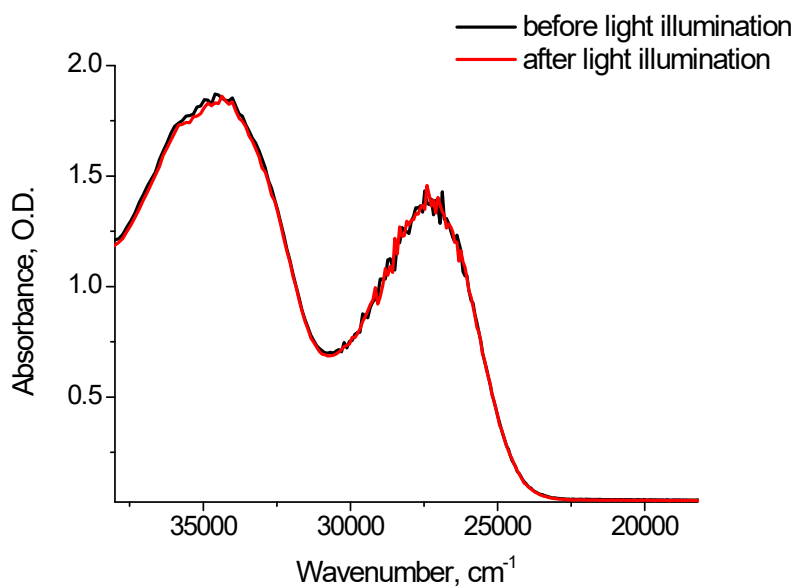

c

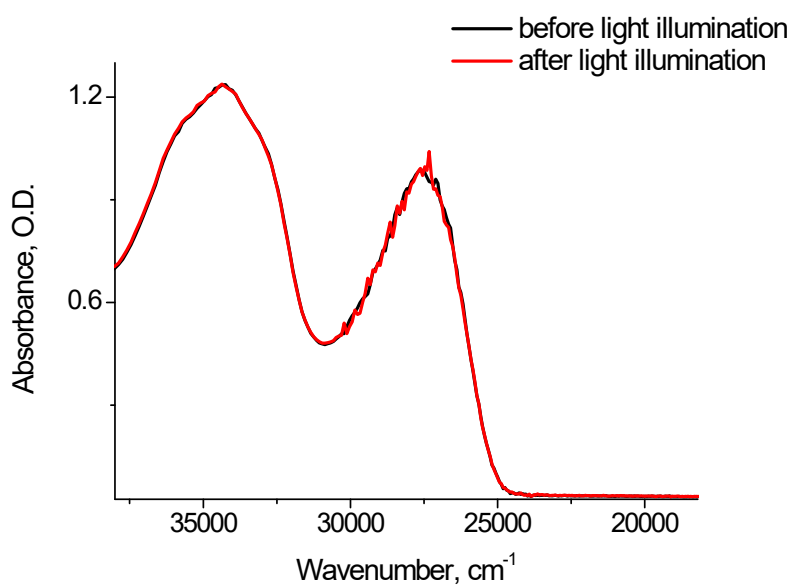

d

**Figure S2.** Photodamage test of tBuTPAterpy, exposed to 405 nm excitation in: chloroform (17  $\mu$ W, 250 min) (a), acetonitrile (100  $\mu$ W, 310 min) (b), glyceryl triacetate (110  $\mu$ W, 310 min) (c), *n*-hexane (95  $\mu$ W, 250 min) (d).

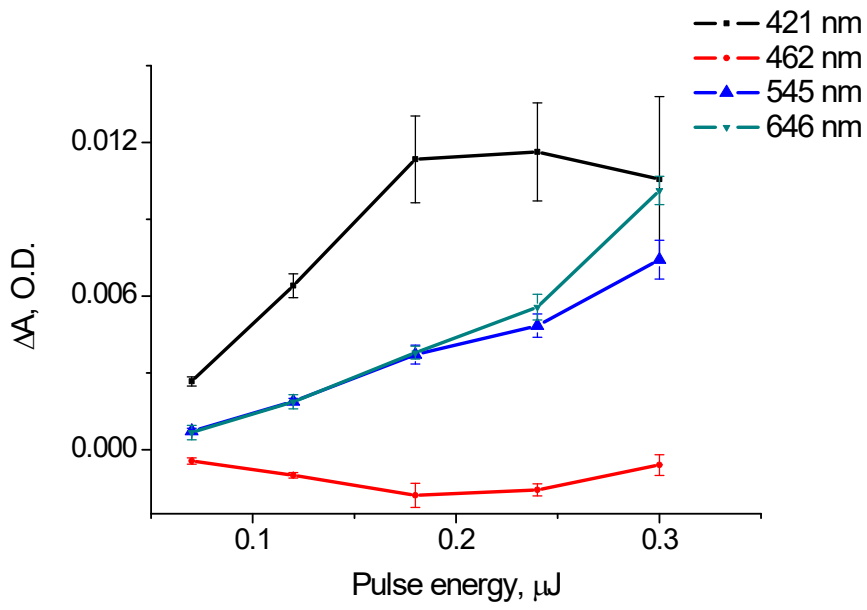

a

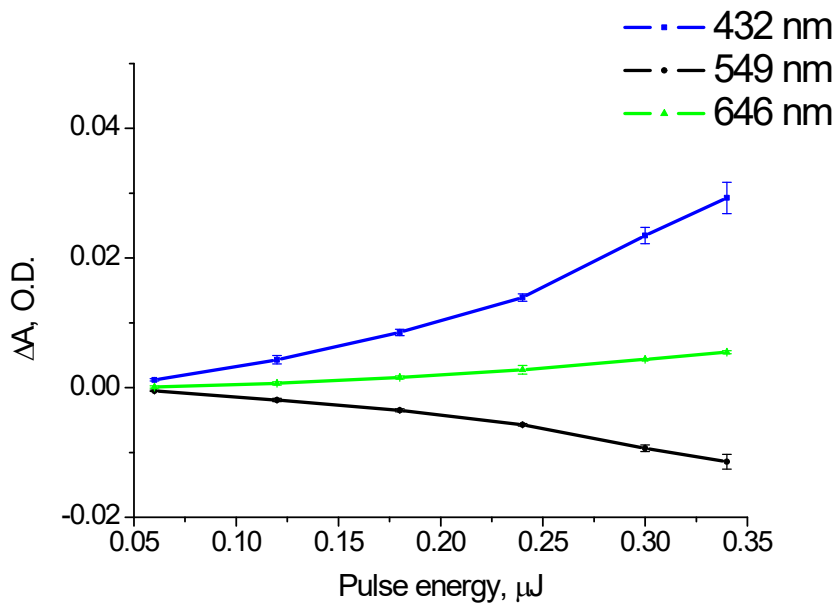

b

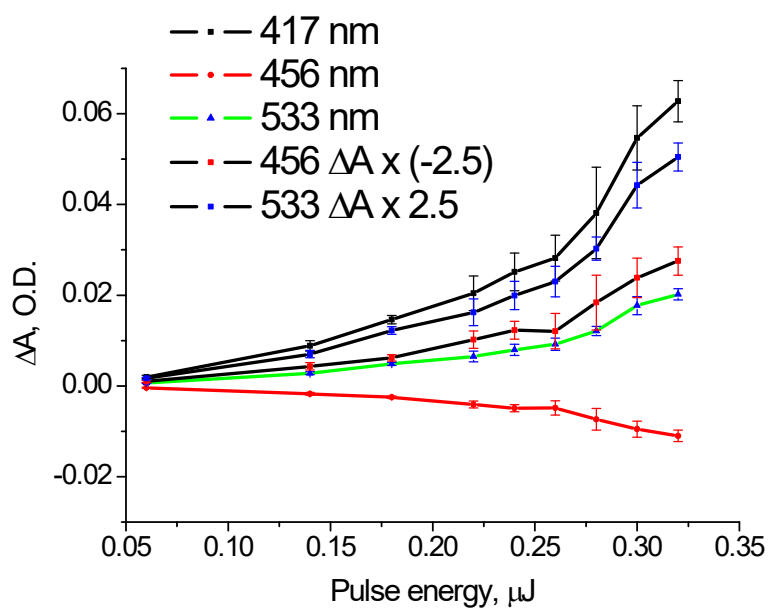

c

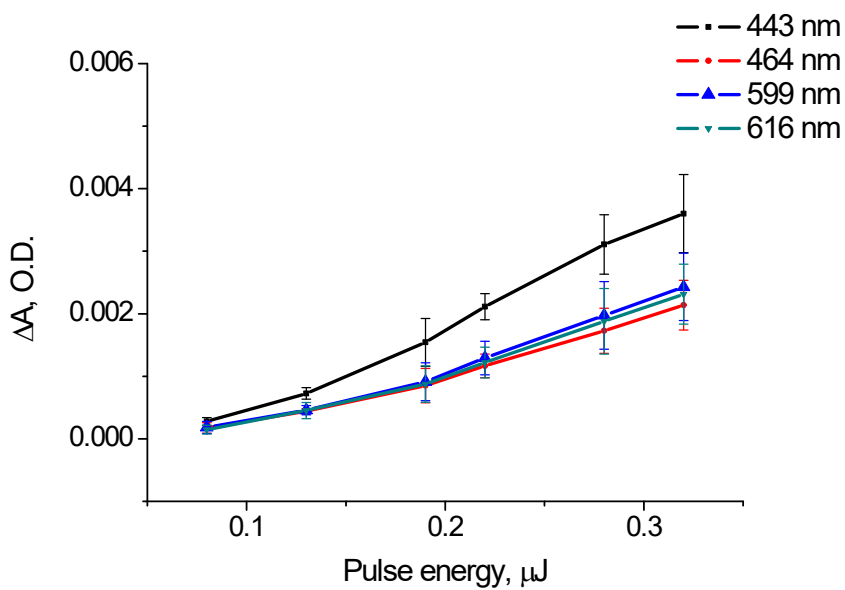

d

**Figure S3.** Fluence dependence for **tBuTPAterpy** in: chloroform (a), acetonitrile (b), glyceryl triacetate (c), *n*-hexane (d).

## **fs fluorescence upconversion measurements**

Broadband femtosecond fluorescence upconversion (fsFIUC) measurements were collected using a setup consisting of a Ti:sapphire laser (Libra, Coherent), delivering 45 fs pulses centred at 800 nm with a repetition rate of 1 kHz, and a fluorescence spectrofluorimeter (LIOP-TEC) [2]. The generated beam centred at 800 nm was split in two, and ~25% of it was transmitted to a white light seeded optical parametric amplifier (OPerA-Solo, Coherent) to generate IR gate pulses of 1300 nm (110  $\mu$ J per pulse), while the rest of the signal was frequency-doubled in a I type of BBO crystal ( $d = 0.5$  mm). The 400 nm pulses were used to excite the sample solution at the magic angle ( $54.7^\circ$ ). Most of the transmitted 400 nm light was blocked on a small beam stop and a 400 nm filter after passing through the sample position. Light upconversion was achieved by focusing both the fluorescence from the sample and the gate pulses onto a 100  $\mu$ m thick BBO crystal (Eksma Optics). A type II sum-frequency generation is obtained from the horizontally polarized gate beam and the vertically polarized fluorescence. This is the most suitable configuration for upconversion of a broad frequency range. The phase-matching requirement and background-free detection of the signal were additionally supported by the large angle ( $21^\circ$ ) between the fluorescence and the gate beam. Then, the generated signal was focused by a concave mirror onto a fiber, while the frequency-doubled gate beam and the upconverted pump beam were blocked.

The light was collected via an unfolded Czerny-Turner spectrograph, including a UV-Vis grating, and detected by a CCD camera (Newton 920, Andor). The computer-controlled delay stage (PI) in the pump path allowed us to collect the upconverted fluorescence signal at different time delays with respect to the photoexcitation event. The full width at half maximum of the cross-correlation between the pump and probe pulses was used to estimate the instrument response function (IRF, equal to 0.140 ps and 0.150 ps, respectively, for  $\text{CHCl}_3$  and acetonitrile solutions). The sample solutions ( $c = 250$   $\mu$ M) used in the FIUC experiments had an optical density of 0.3 – 0.5 at 400 nm (1 mm optical path quartz cuvettes) and was stirred with argon flow to avoid bleaching. For the global analysis of the FIUC data, the linear unidirectional sequential model of the Optimus<sup>TM</sup> [3] software was used.

## **fs TA measurements**

The TA experiments were performed using a pump–probe transient absorption spectroscopy system (Ultrafast Systems, Helios). A regenerative amplified femtosecond Ti:sapphire laser system (Astrella, Coherent) delivered pulses of 100 fs duration with 5 mJ pulse energy at a repetition rate of 1 kHz and a central wavelength of 800 nm. The excitation pulses at 405 nm were generated from an optical parametric amplifier (Light Conversion, TOPAS prime). The white light continuum probe was generated by focusing the residual of the fundamental light into a  $\text{CaF}_2$  crystal. The pump pulse was chopped by a mechanical chopper synchronised to one-half of the laser repetition rate and depolarised to mimic the dynamical changes of the orientation of the molecules. The delay time between the pump



and probe pulses was controlled with a delay line over a time scale up to 7.0 ns. For the detection of the transient absorption signals, the white light continuum passing through the sample was sent to a CCD detector installed in the system.

All TA experiments were carried out in solution using quartz cuvettes with a 2 mm path length. The solution concentration of 125  $\mu\text{M}$  was selected in order to have an absorbance at the 405 nm pump wavelength in the range 0.25-0.5 O.D. During the experiments, sample damaging was prevented by stirring the solution.

TA data were initially processed using the Surface Explorer (Ultrafast Systems) software and then analysed with use of the Optimus<sup>TM</sup> software [3]. Background correction, scattered light subtraction, solvent signal contribution subtraction and removal of spikes in the TA maps were routinely performed prior to the global lifetime analysis. The IRF and the white light chirp of the experiments were measured in the pure solvents (full width at half maximum, FWHM, of  $\sim 160\text{fs}$ ,  $\sim 150\text{fs}$ ,  $\sim 150\text{fs}$ ,  $\sim 150\text{fs}$  respectively for  $\text{CHCl}_3$ , glyceryl triacetate, acetonitrile, *n*-hexane). The global analysis of the TA maps was performed using the linear unidirectional sequential model implemented in the Optimus<sup>TM</sup> software [3]. This analysis allowed the deconvolution of the transient spectra into evolution-associated spectra (EAS), providing the decay-associated spectra (DAS) as a linear combination of the EAS. Pump light scattering in the wavelength range 390 – 410 nm was excluded from the analysis.

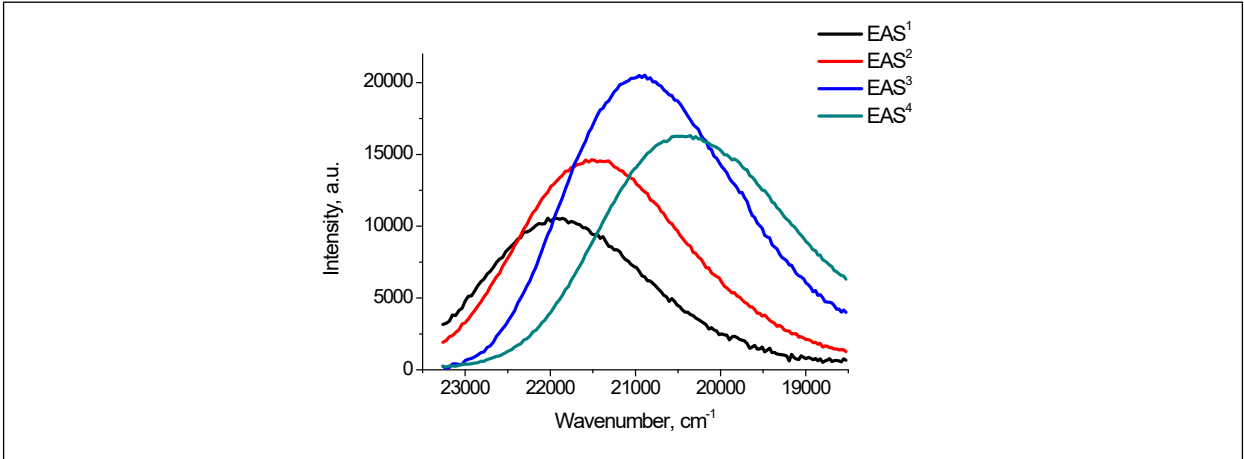

A

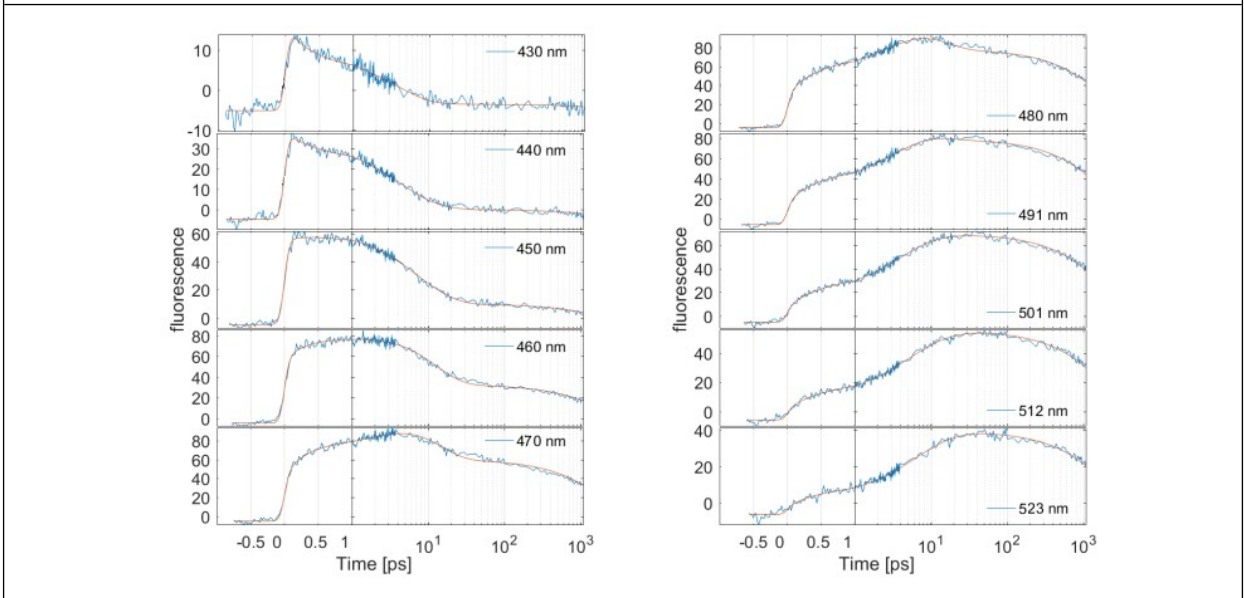

B

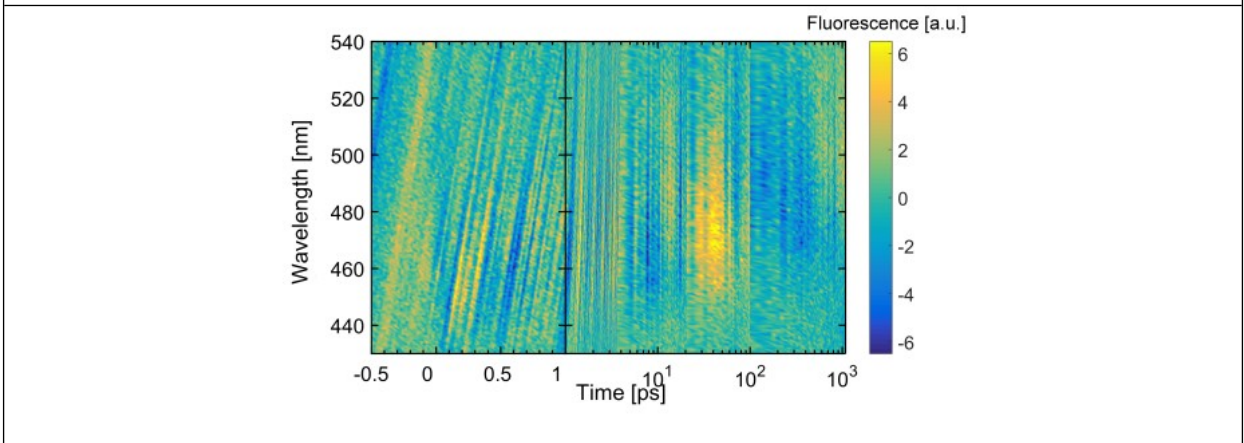

C

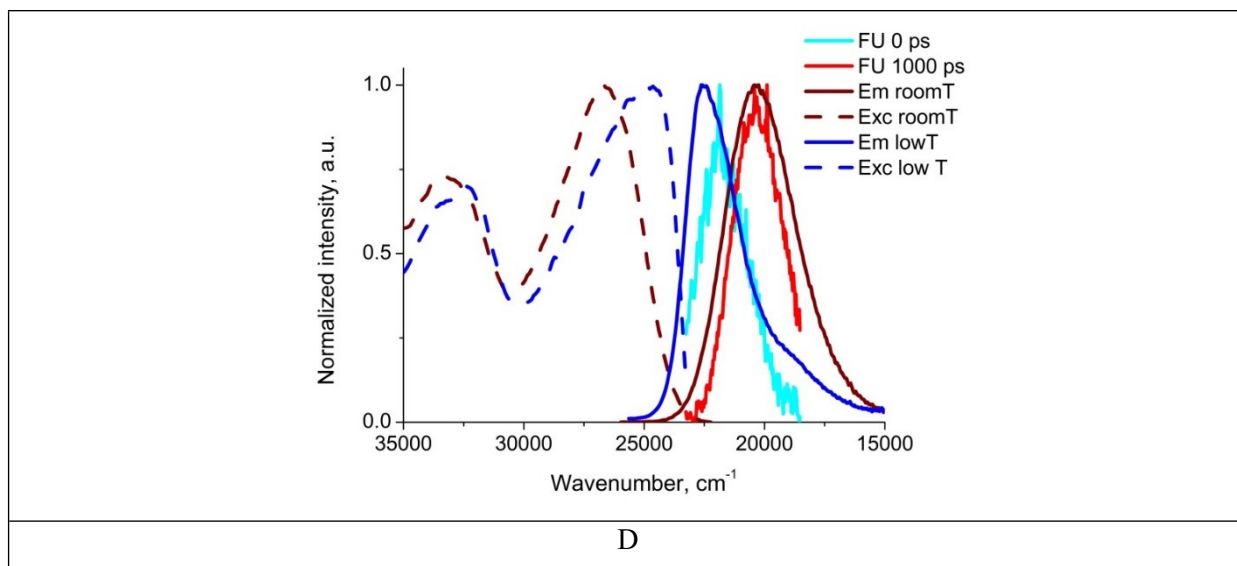

**Figure S4.** Evolution associated spectra (A), time traces and fitting curves obtained with the global analysis of the FIUC 2D maps (B) and the map of residuals (C) of **tBuTPAterpy** in  $\text{CHCl}_3$ . Comparison of steady-state emission (Em) and excitation (Exc) spectra at low (77 K) and room temperatures with the fluorescence upconverted (FU) signal at 0.2 ps and 1000 ps time delays (D).

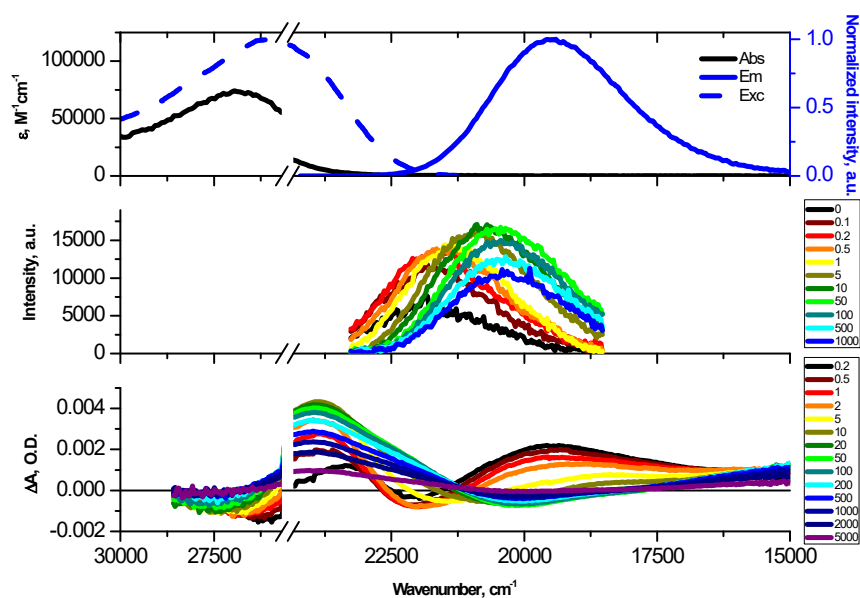

**Figure S5.** Comparison of absorption (Abs) [1], emission (Em) [1] and excitation (Exc) [1] spectra (top), FIUC spectra (middle) and TA spectra (bottom) of **tBuTPAterpy** in  $\text{CHCl}_3$ .

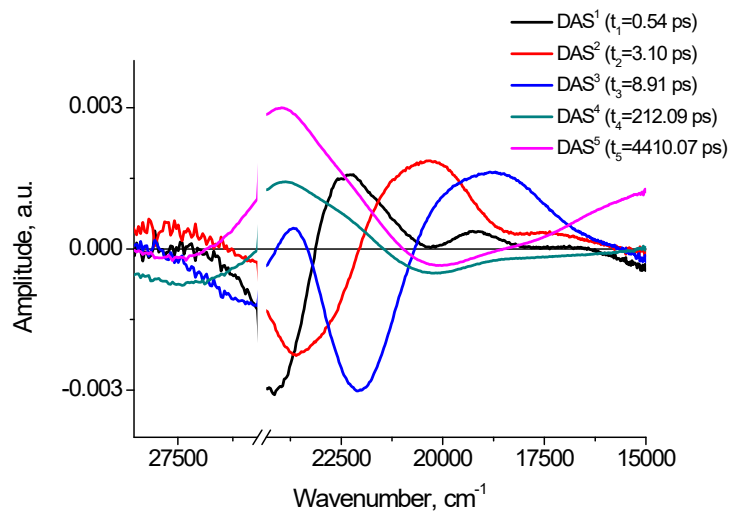

A

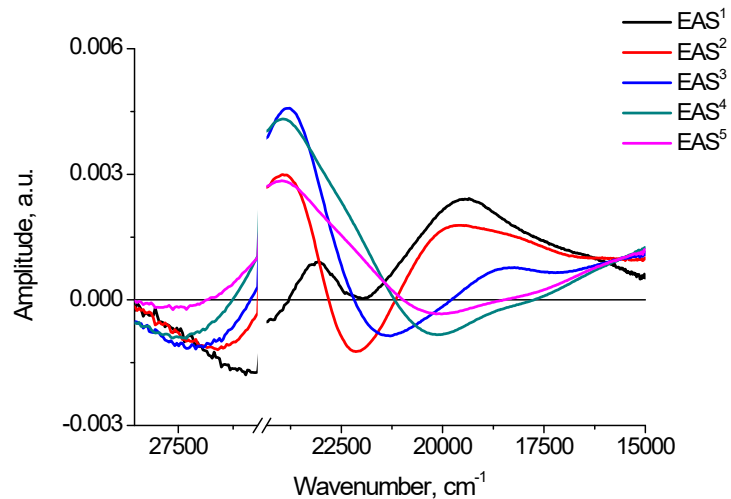

B

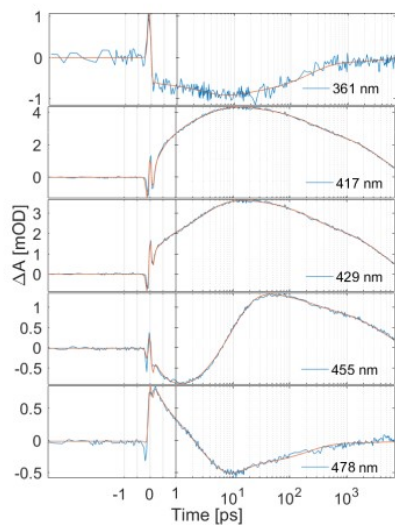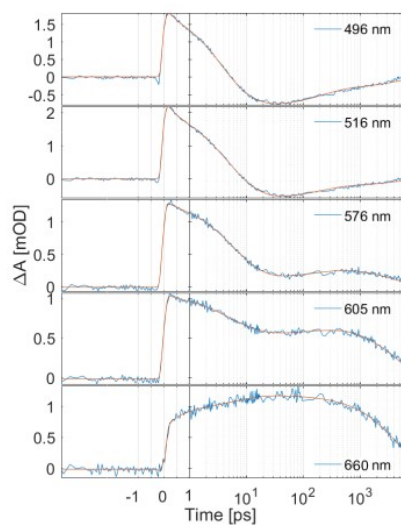

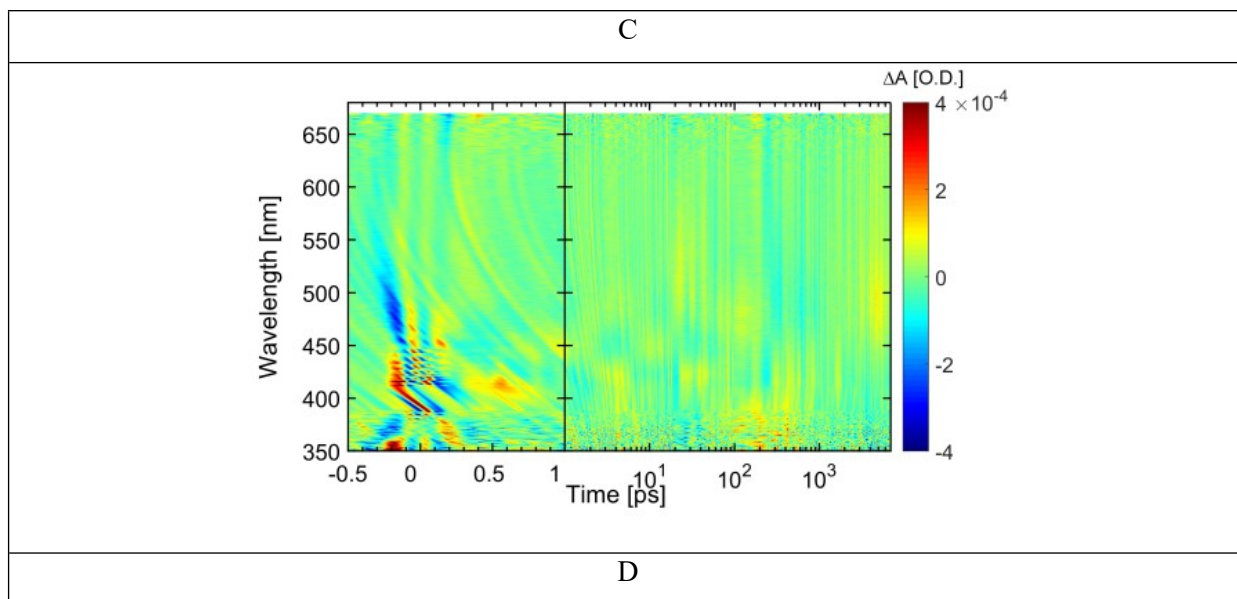

**Figure S6.** Decay associated spectra (A), evolution associated spectra (B), time traces and the fitting curves obtained from the global analysis of the TA 2D maps (C), and the map of residuals (D) of **tBuTPAterpy** in  $\text{CHCl}_3$ . The spectral range 395 – 410 nm was excluded from analysis due to pump light scattering.

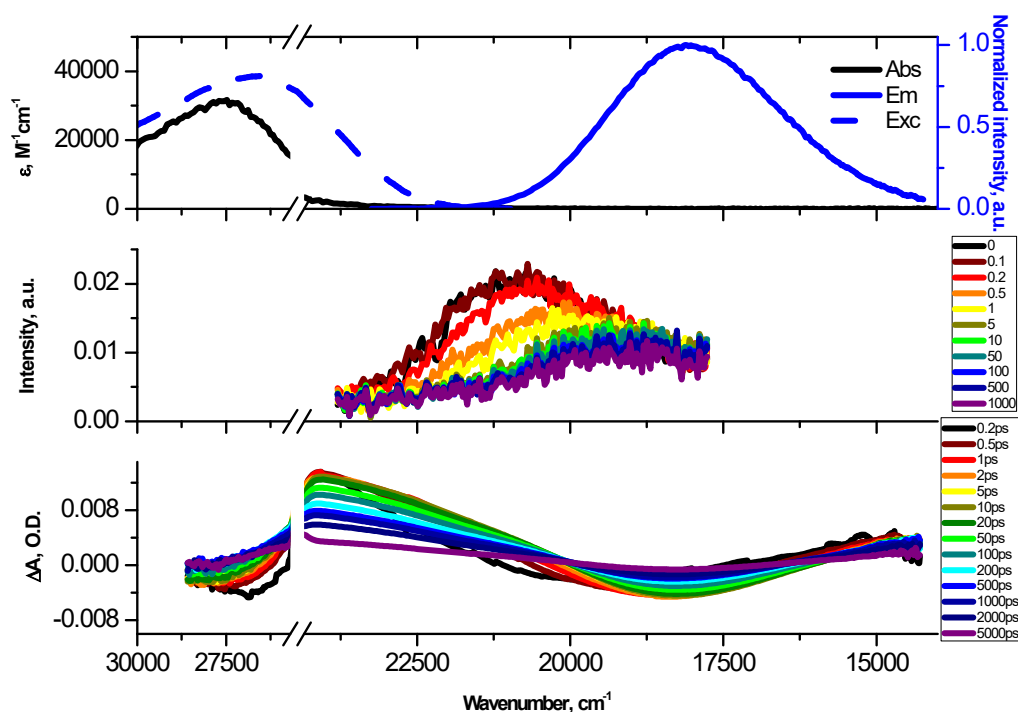

**Figure S7.** Comparison of FIUC, TA spectra and steady-state absorption (Abs) [1], emission (Em) [1] and excitation (Exc) [1] spectra of **tBuTPAterpy** in acetonitrile.

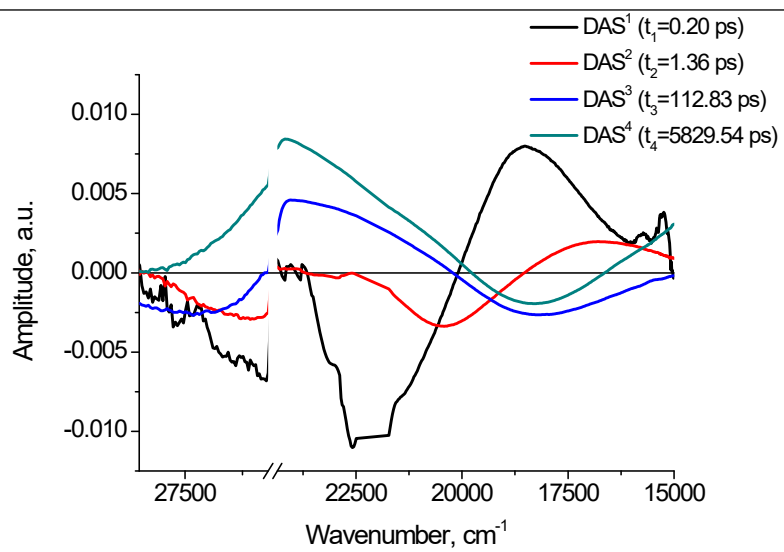

A

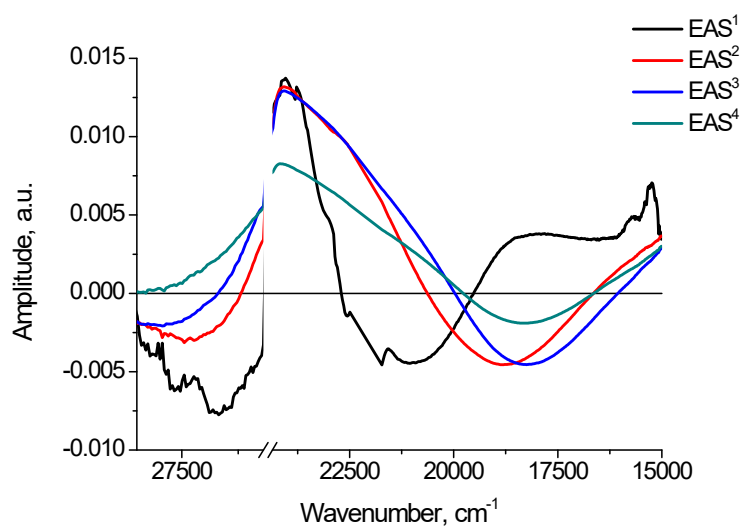

B

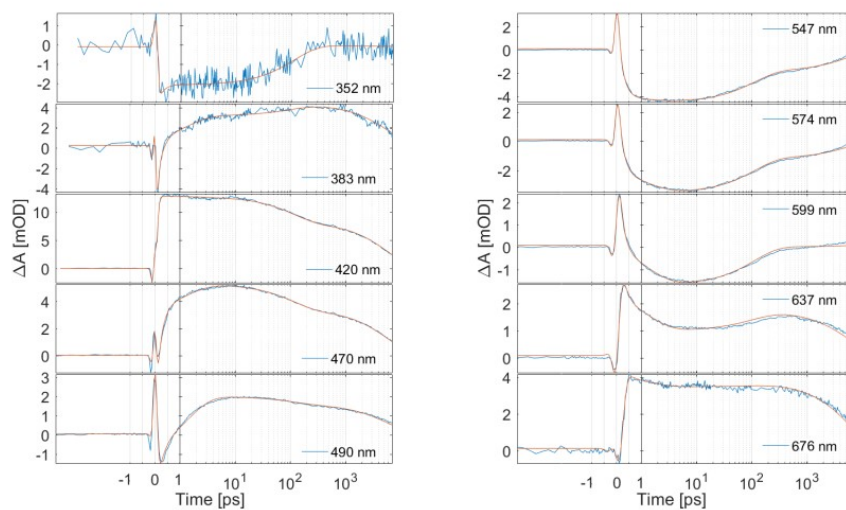

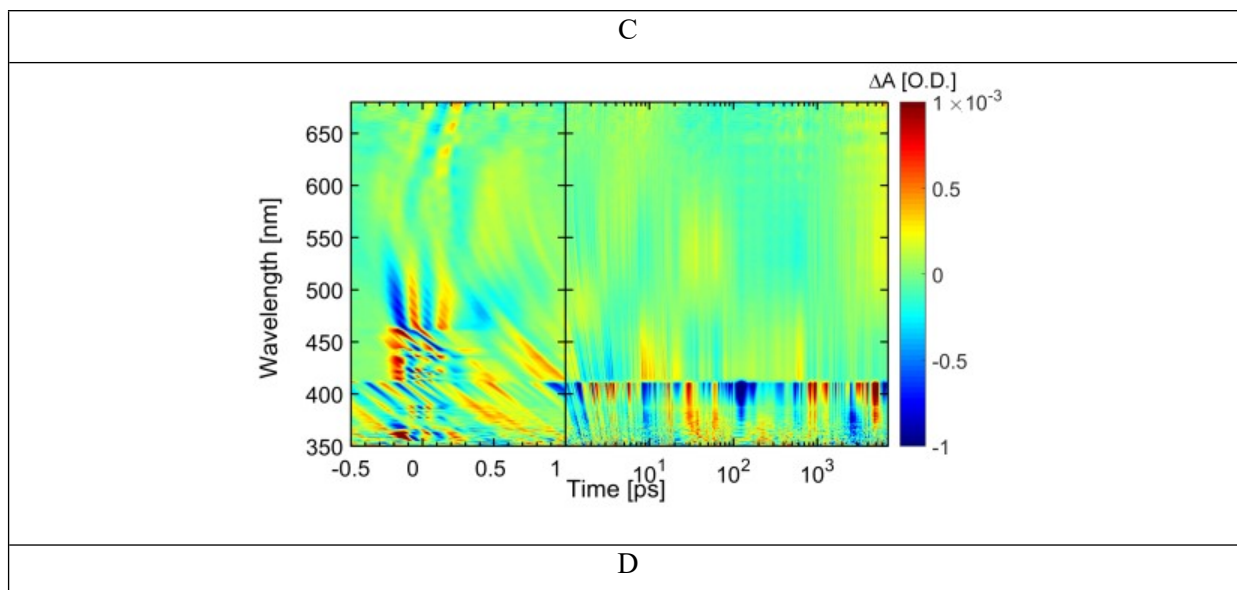

**Figure S8.** Decay associated spectra (A), evolution associated spectra (B), time traces and fitting curves obtained from the global analysis of the TA 2D maps (C) and the map of residuals (D) of **tBuTPAterpy** in acetonitrile. The spectral range 395 – 410 nm was excluded from analysis due to pump light scattering.

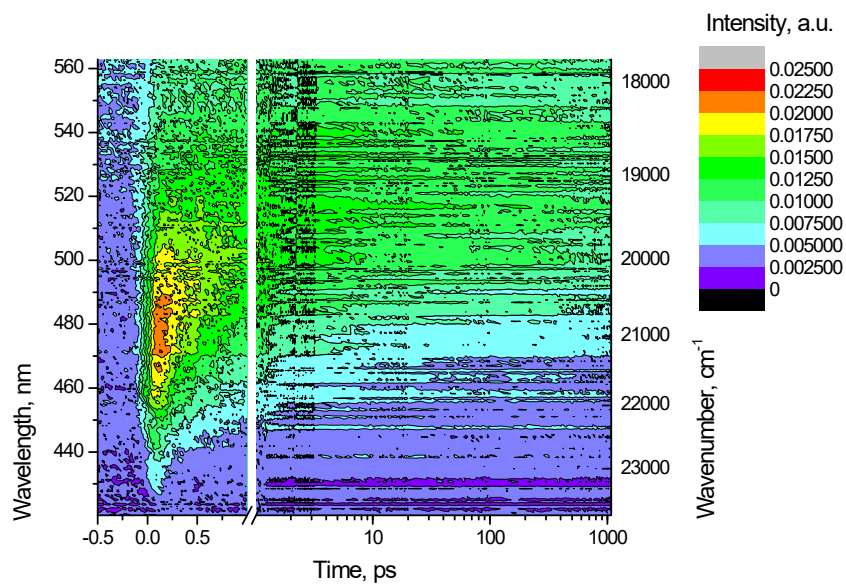

A

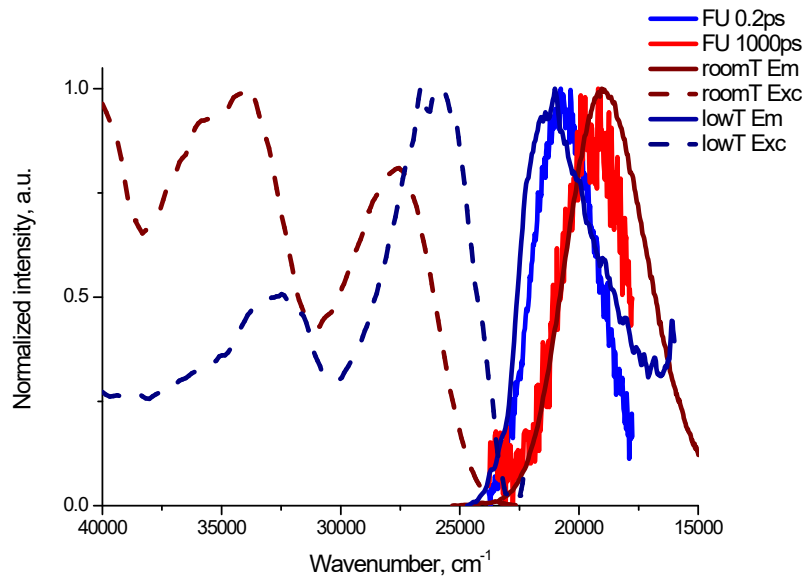

B



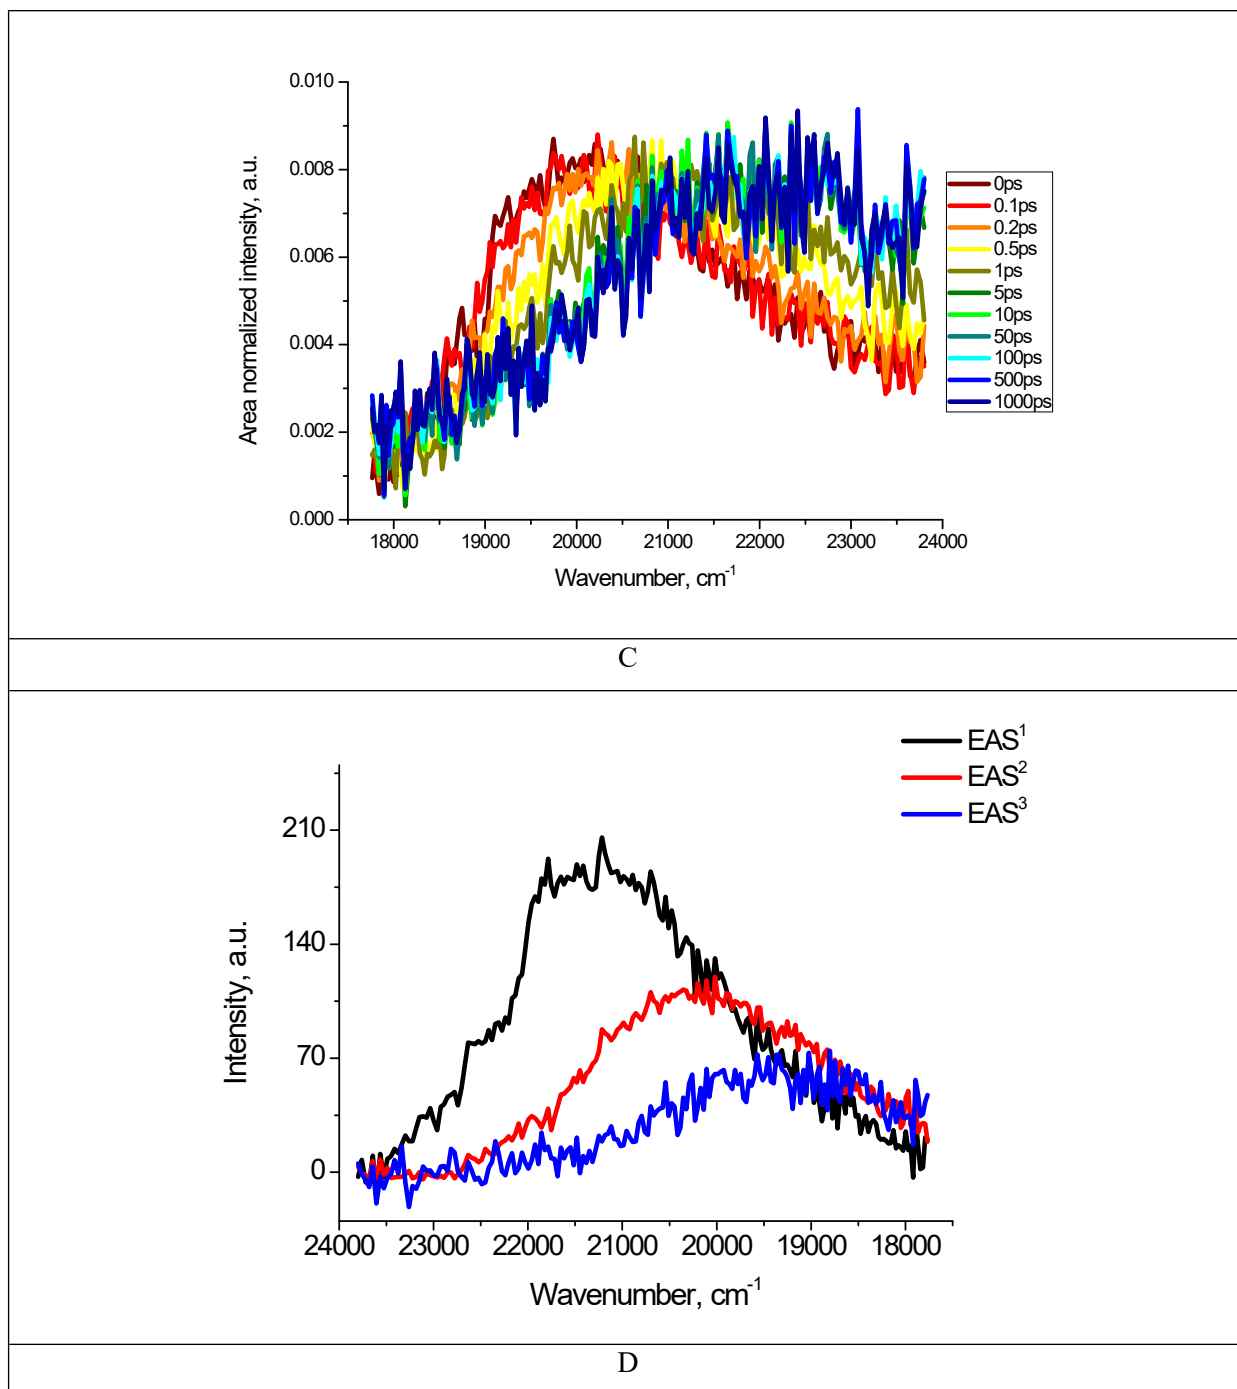

**Figure S9.** FIUC data for **tBuTPAterpy** in acetonitrile: FIUC 2D plot (A); comparison of steady-state emission (Em) and excitation (Exc) spectra at low (77 K) and room temperatures with the fluorescence upconverted (FU) signal at 0.2 ps and 1000 ps time delays (B); Time-resolved area normalized emission spectra (C); evolution associated spectra (D).

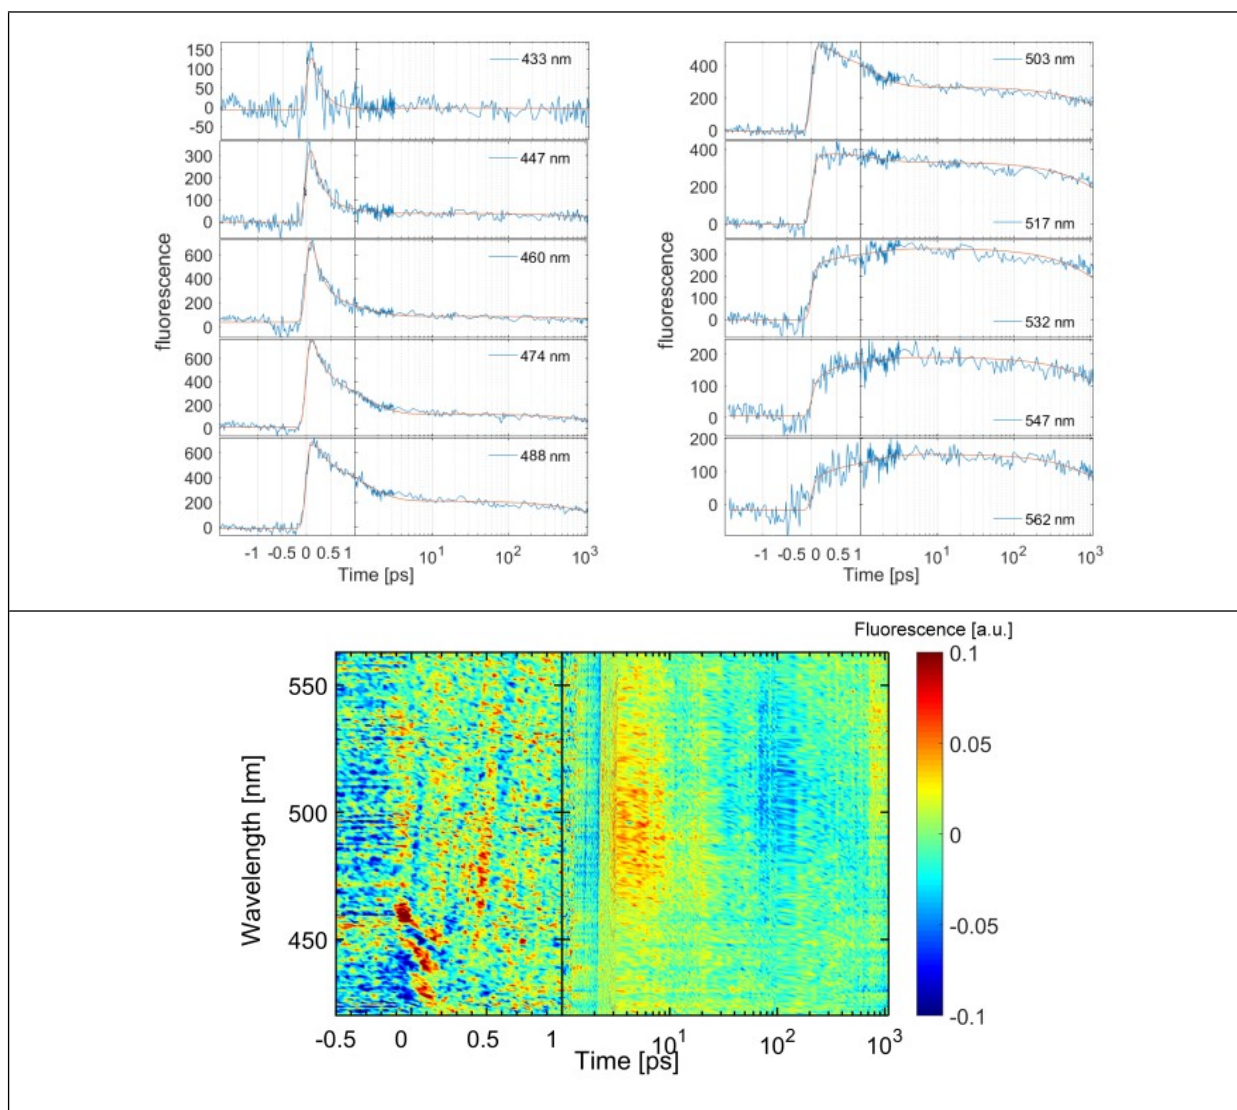

**Figure S10.** Time traces and the fitting curves obtained with the global analysis of the FIUC 2D maps (top) and the map of residuals (bottom) of **tBuTPAterpy** in acetonitrile. The spectral range 380 – 420 nm was excluded from the analysis due to pump scattering. The Raman scattering of the solvent was excluded from analysis.

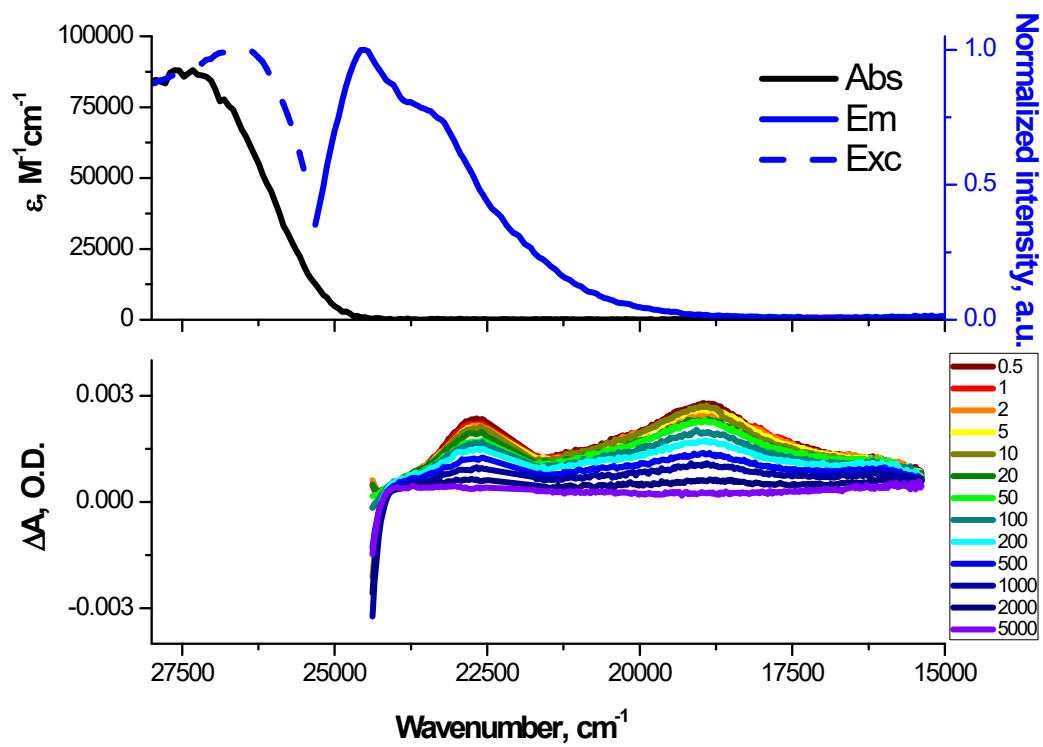

**Figure S11.** Comparison of TA spectra and steady-state absorption (Abs), emission (Em) and excitation (Exc) spectra of **tBuTPAterpy** in *n*-hexane.

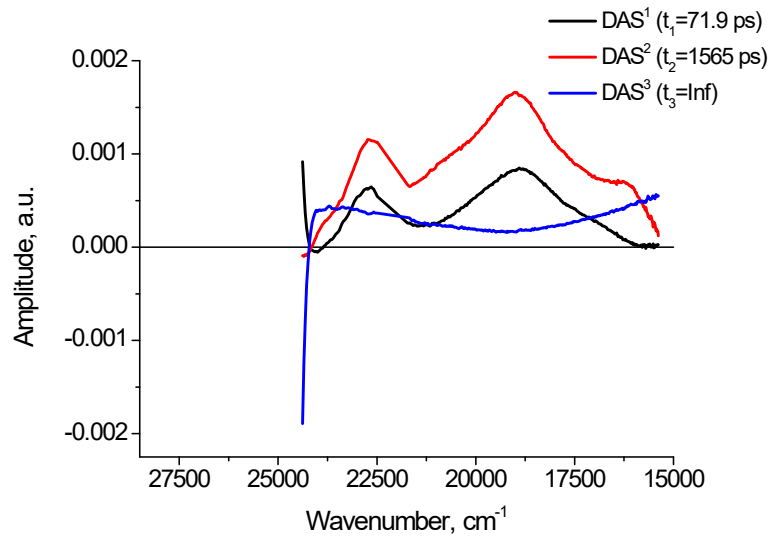

A

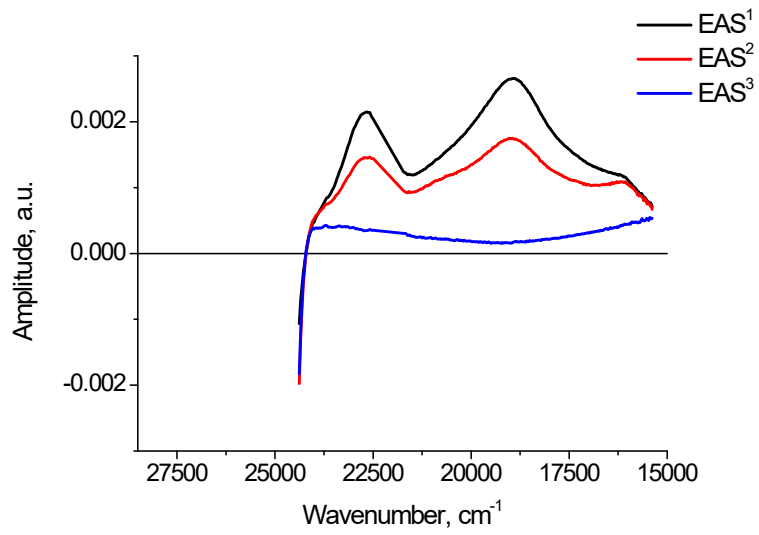

B

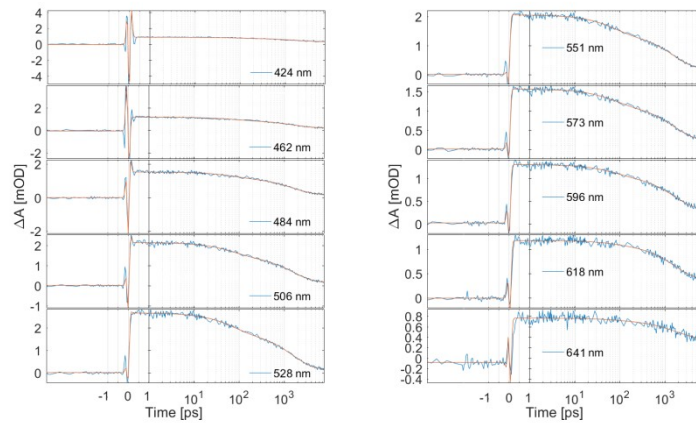

C

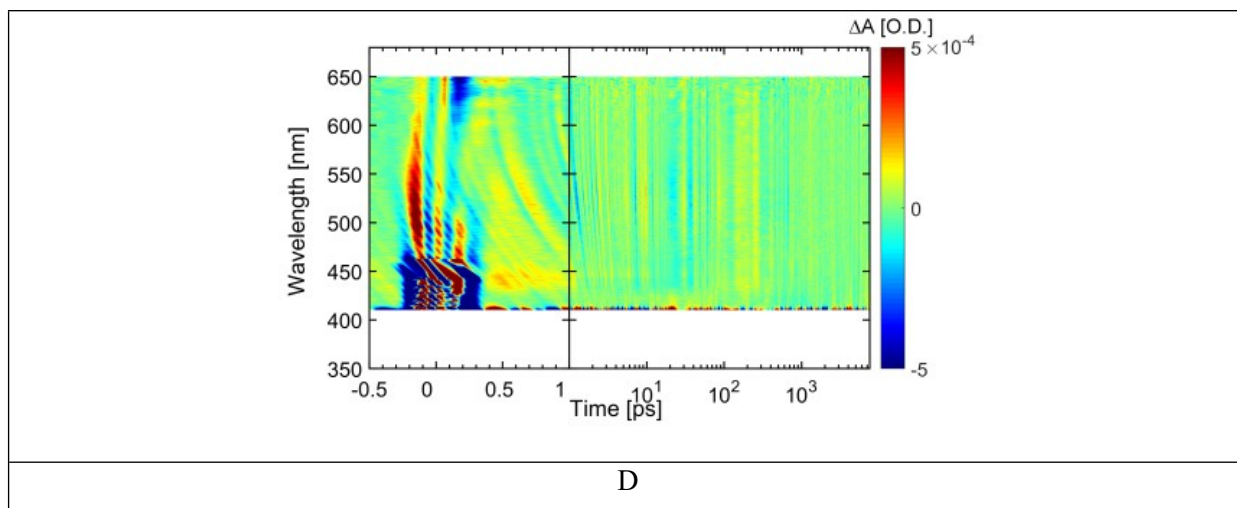

**Figure S12.** Decay associated spectra (A), evolution associated spectra (B), time traces and fitting curves obtained from the global analysis of the TA 2D maps (C) and the map of residuals (D) of **tBuTPAterpy** in *n*-hexane. Data in the range 445 – 460 nm containing the Raman scattering of the solvent were excluded from the analysis.

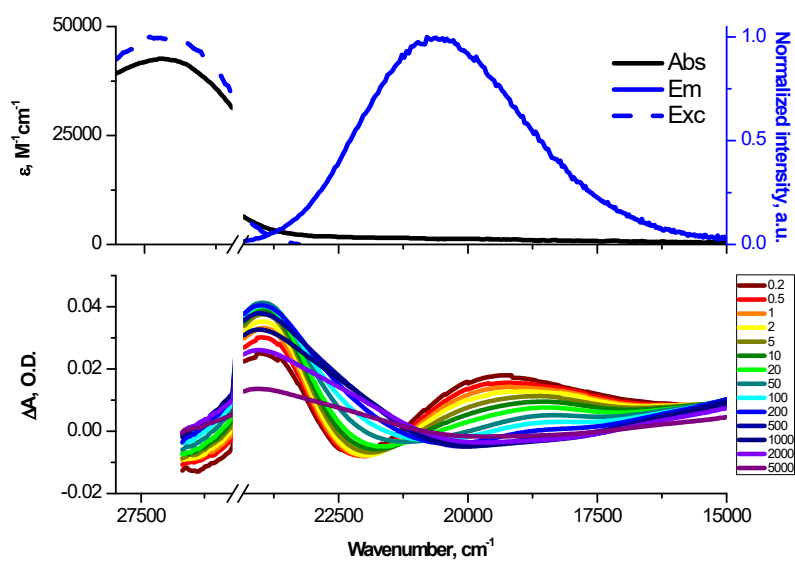

**Figure S13.** Comparison of steady-state absorption (Abs), emission (Em) and excitation (Exc) spectra (top) and TA spectra (bottom) of **tBuTPAterpy** in glyceryl triacetate.

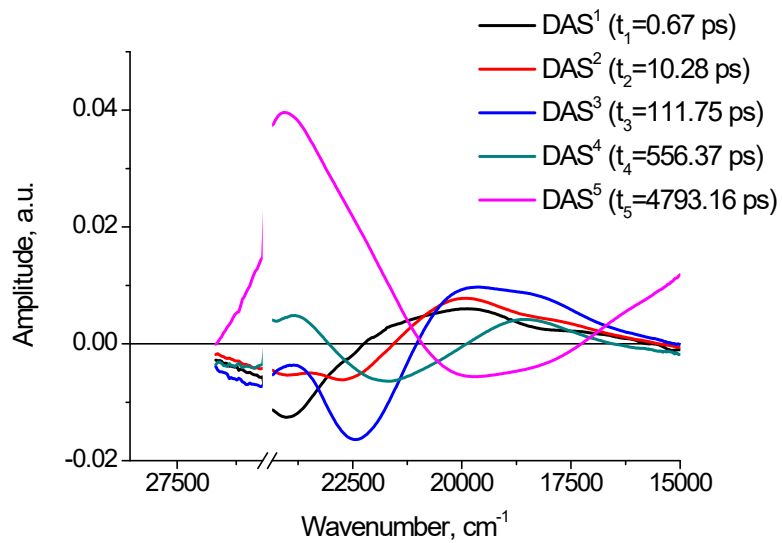

A

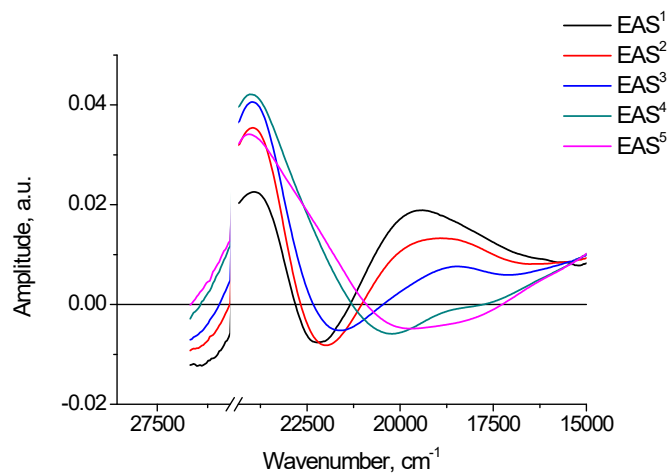

B

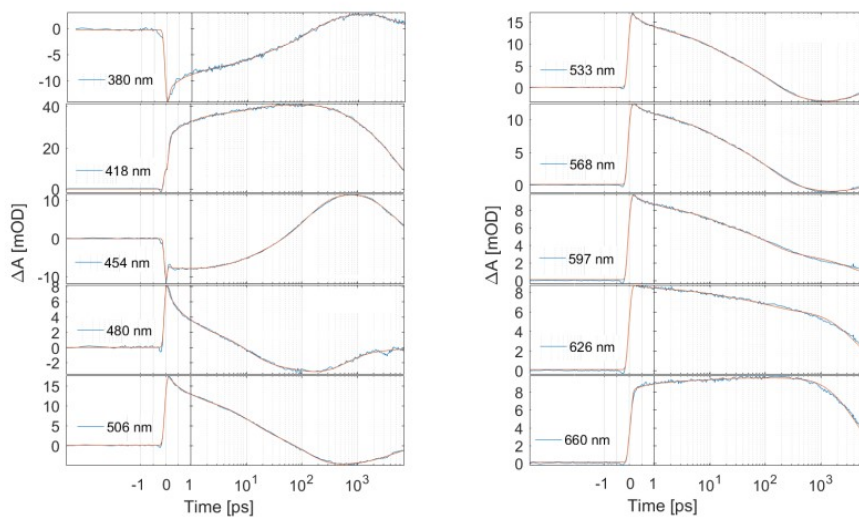

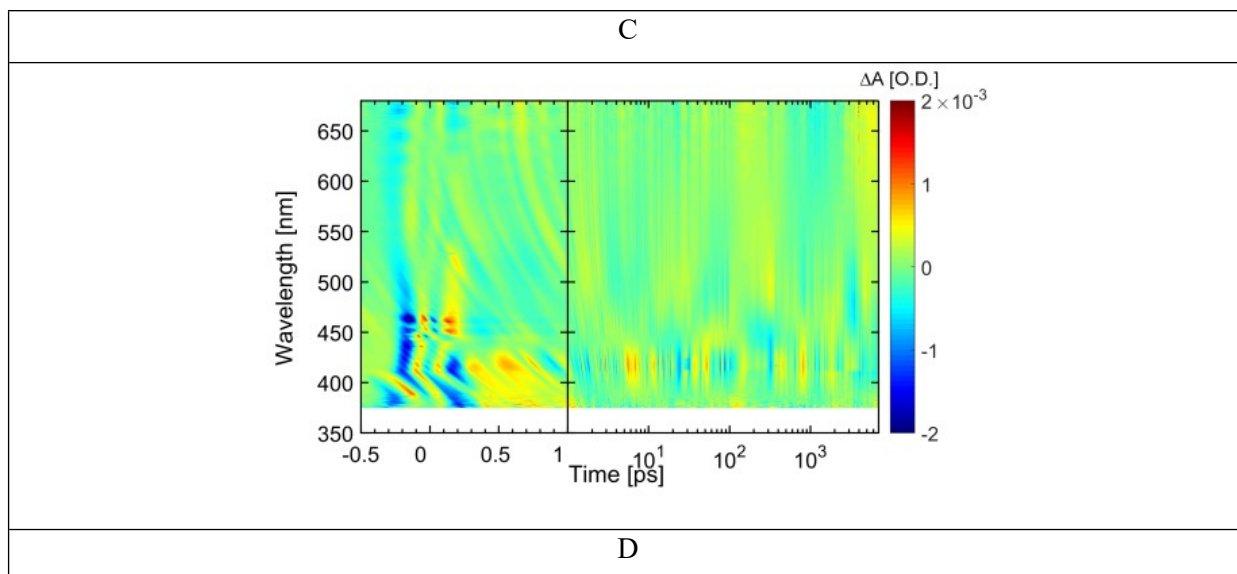

**Figure S14.** Decay associated spectra (A), evolution associated spectra (B), time traces and fitting curves obtained from the global analysis of the TA 2D maps (C) and the map of residuals (D) of **tBuTPAterpy** in glyceryl triacetate. The spectral range 395 – 410 nm was excluded from the analysis due to pump scattering.

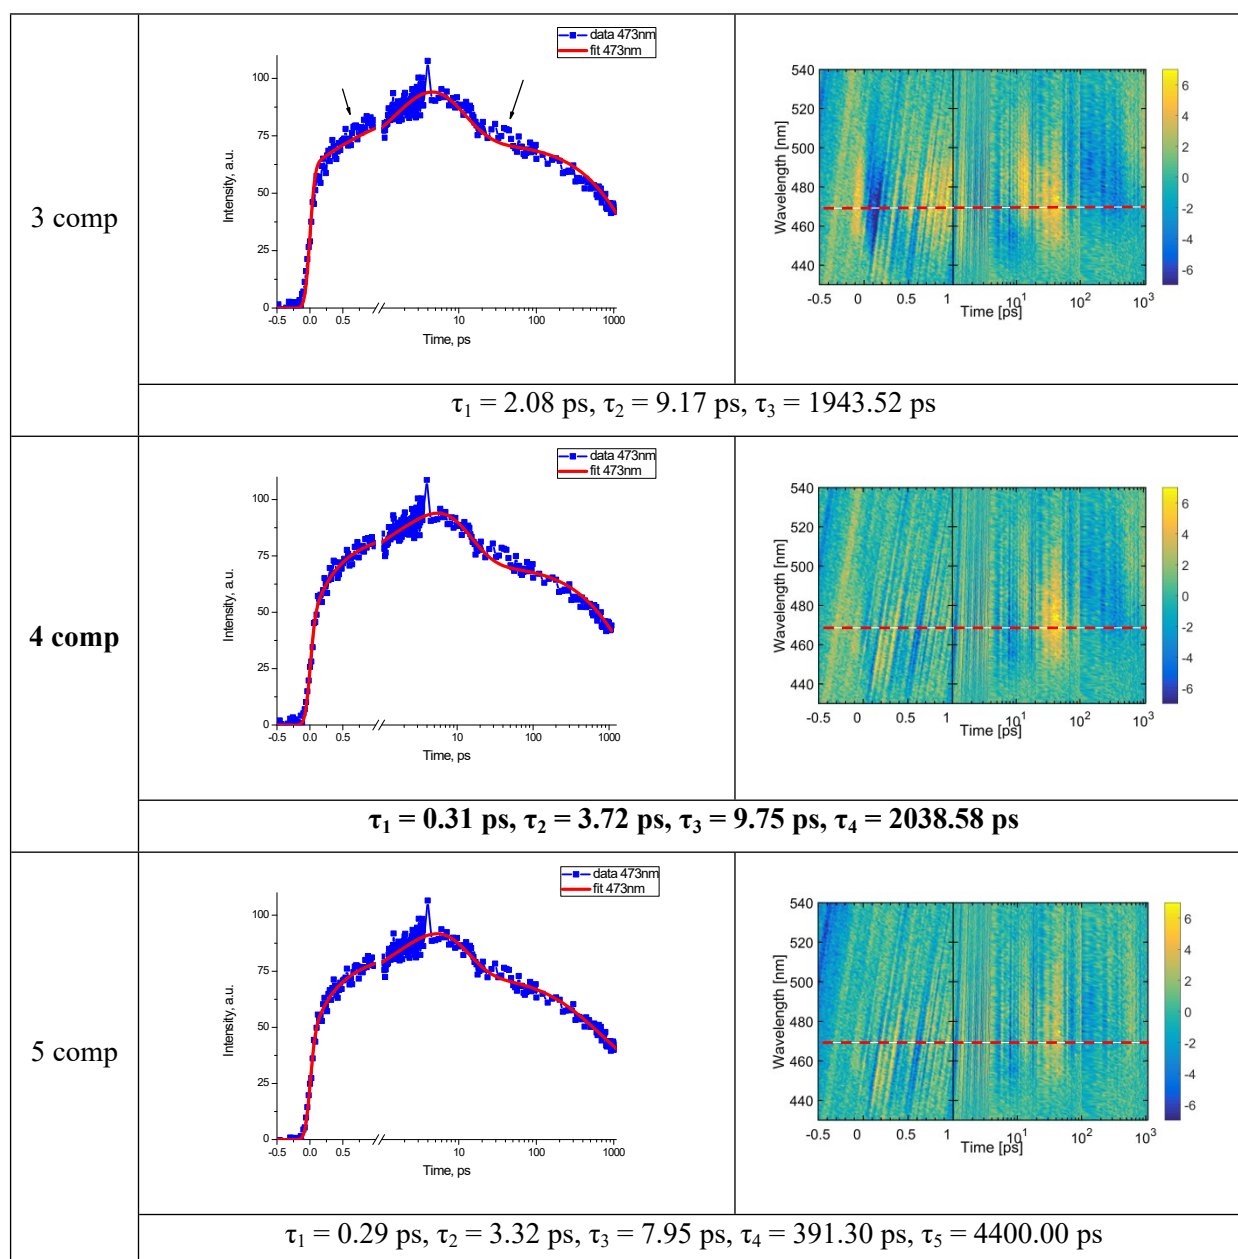

**Figure S15.** Representative time traces (at 473 nm) and fitting curves obtained with an increasing number of time components in the global analysis of the FIUC 2D maps (left) and the map of residuals (right) of **tBuTPAterpy** in  $\text{CHCl}_3$ .



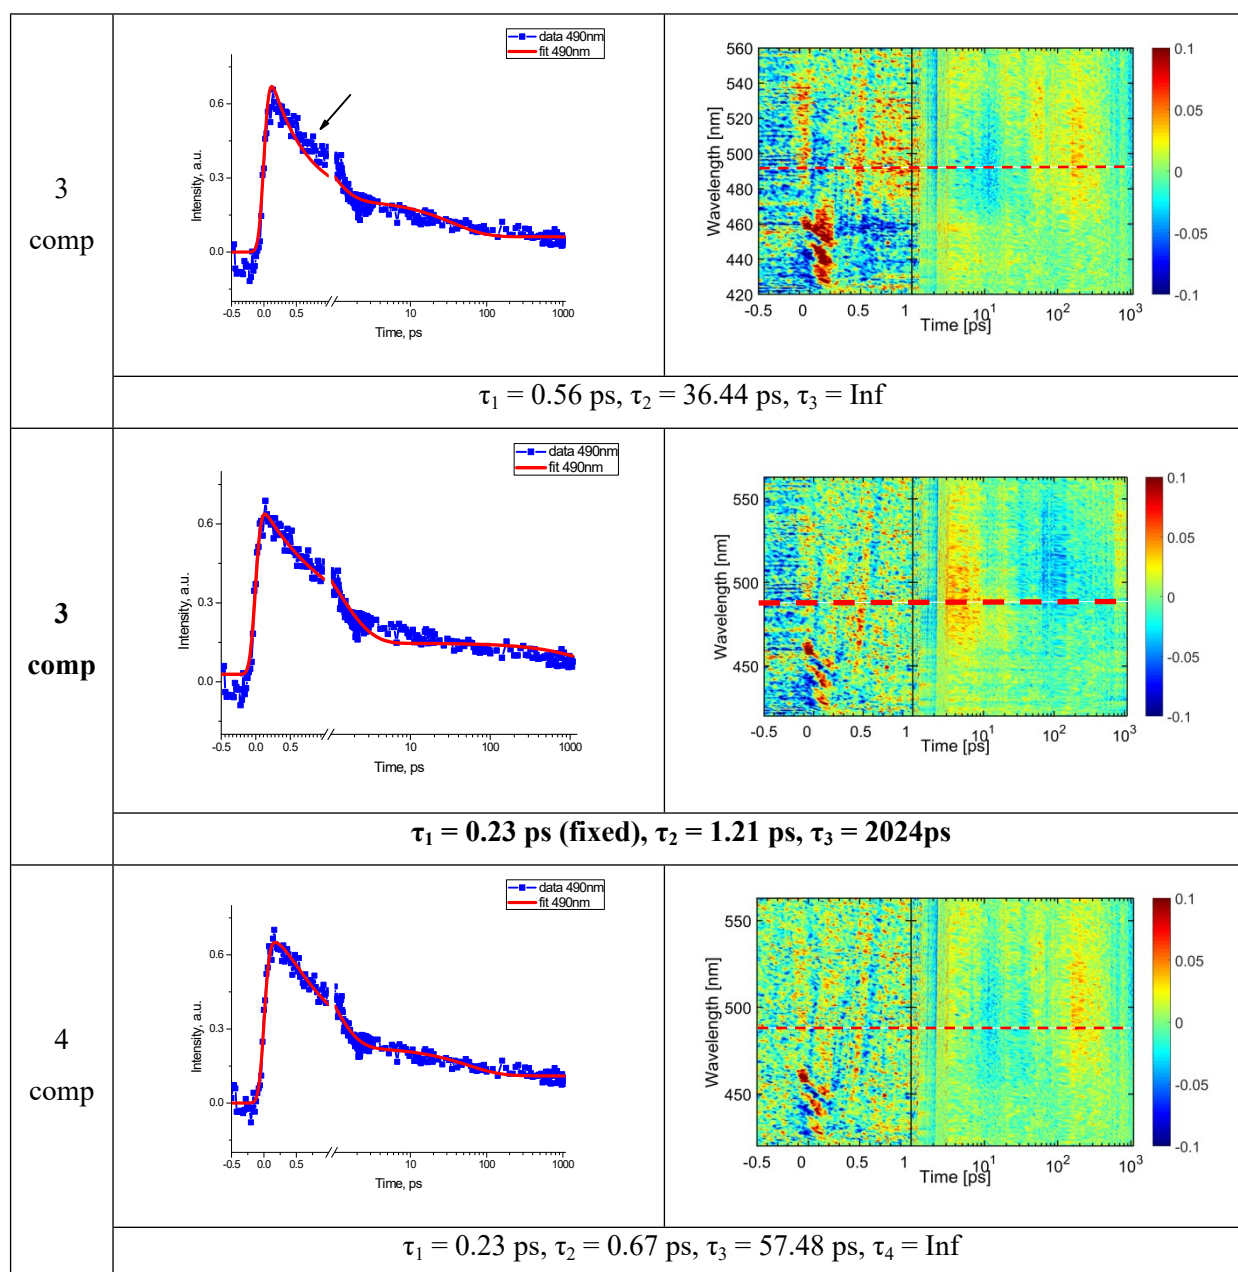

**Figure S16.** Representative time traces (at 490 nm) and fitting curves obtained with an increasing number of time components in the global analysis of the FIUC 2D maps (left) and the map of residuals (right) of **tBuTPAterpy** in acetonitrile.

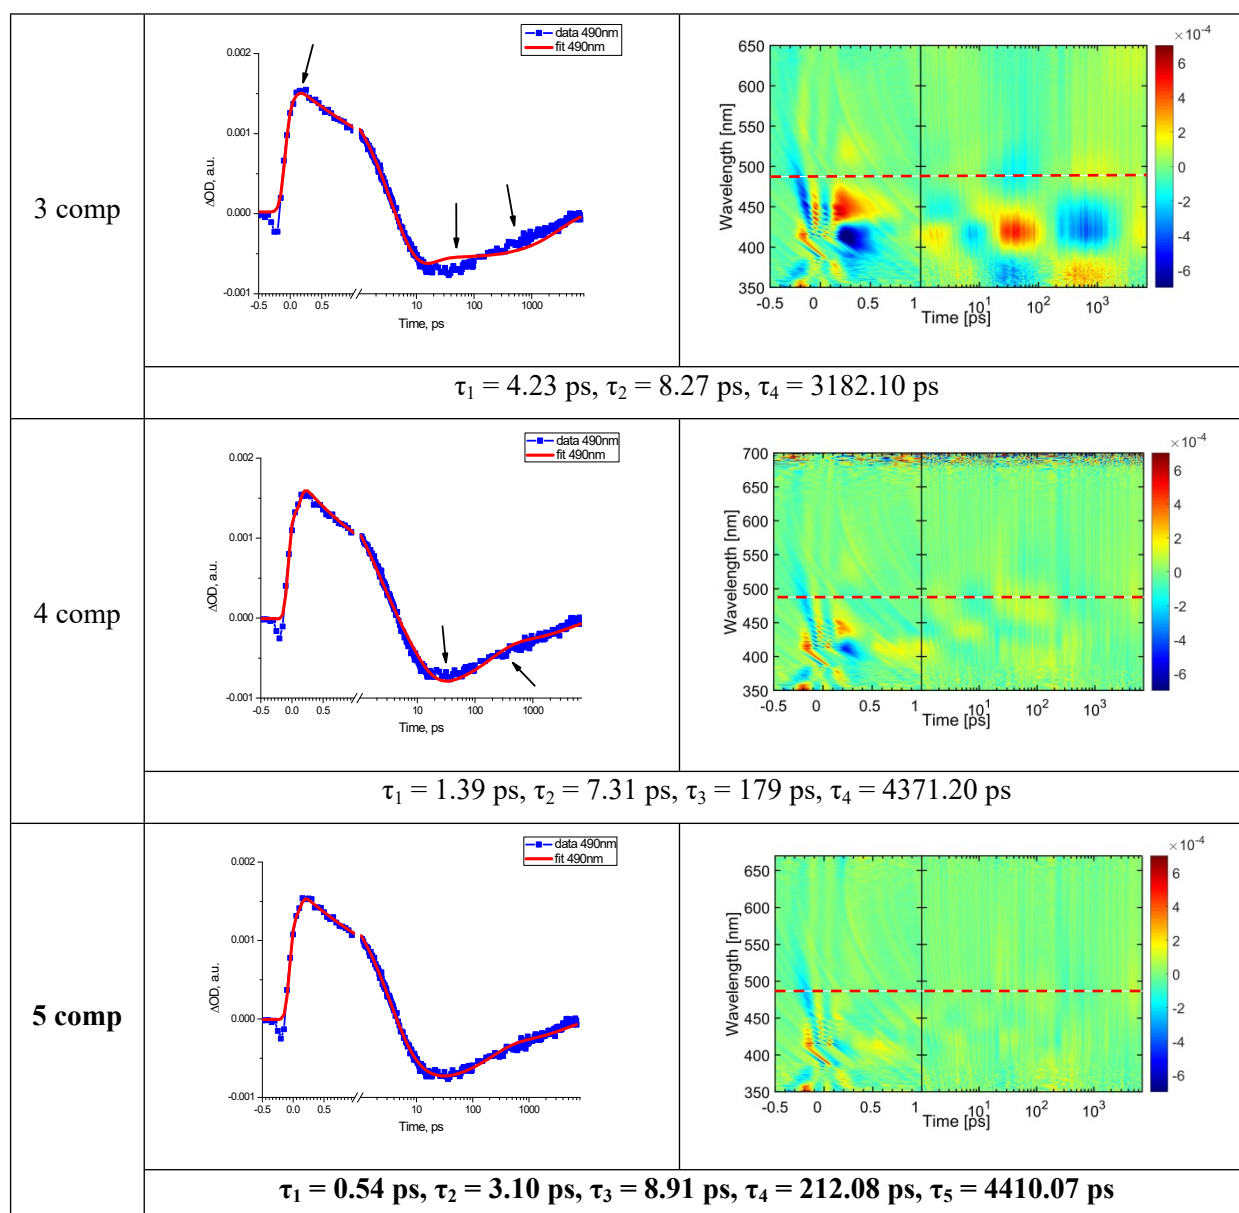

**Figure S17.** Representative time traces (at 490 nm) and fitting curves obtained with an increasing number of time components in the global analysis of the TA 2D maps (left) and the map of residuals (right) of **tBuTPAterpy** in  $\text{CHCl}_3$ . The spectral range 395 – 410 nm was excluded from the analysis due to light scattering.

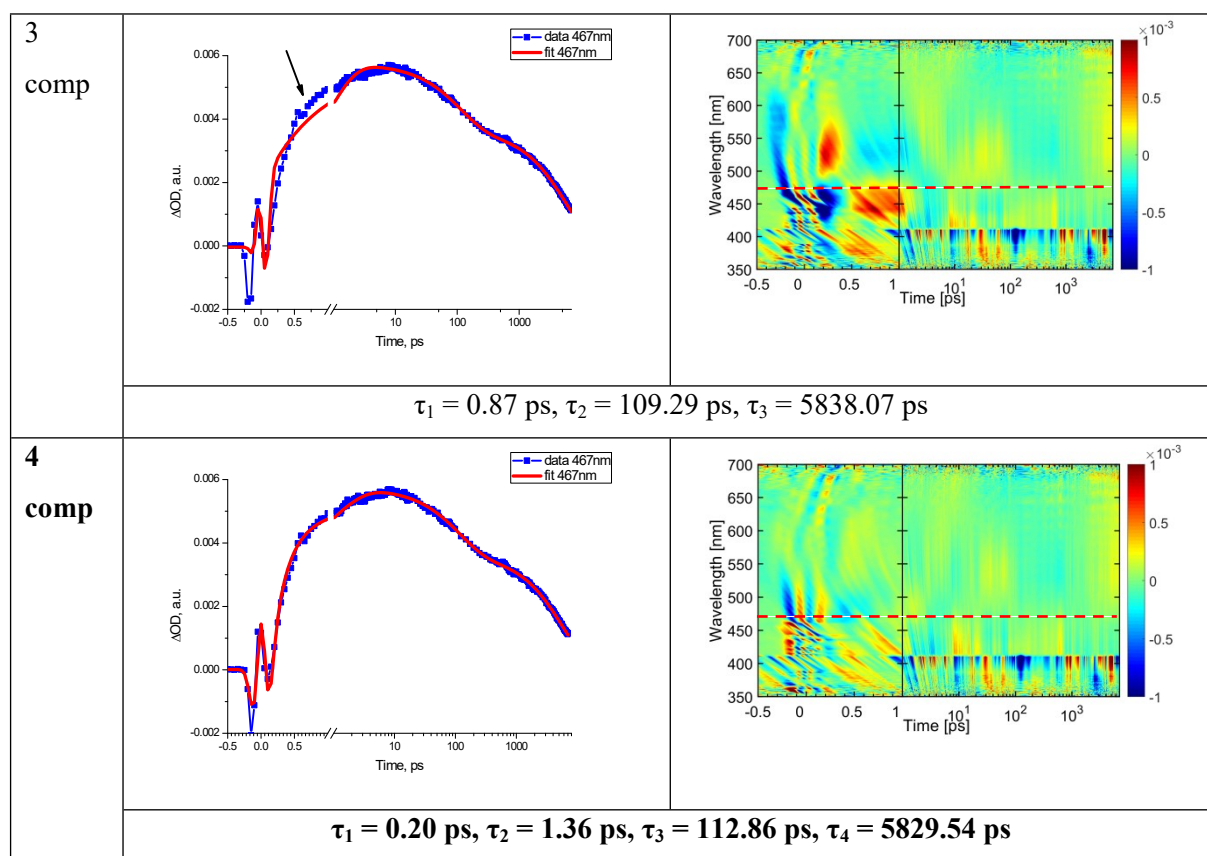

**Figure S18.** Representative time traces (at 490 nm) and fitting curves obtained with an increasing number of time components in the global analysis of the TA 2D maps (left) and the map of residuals (right) of **tBuTPAterpy** in acetonitrile. The spectral range 395 – 410 nm was excluded from the analysis due to light scattering.

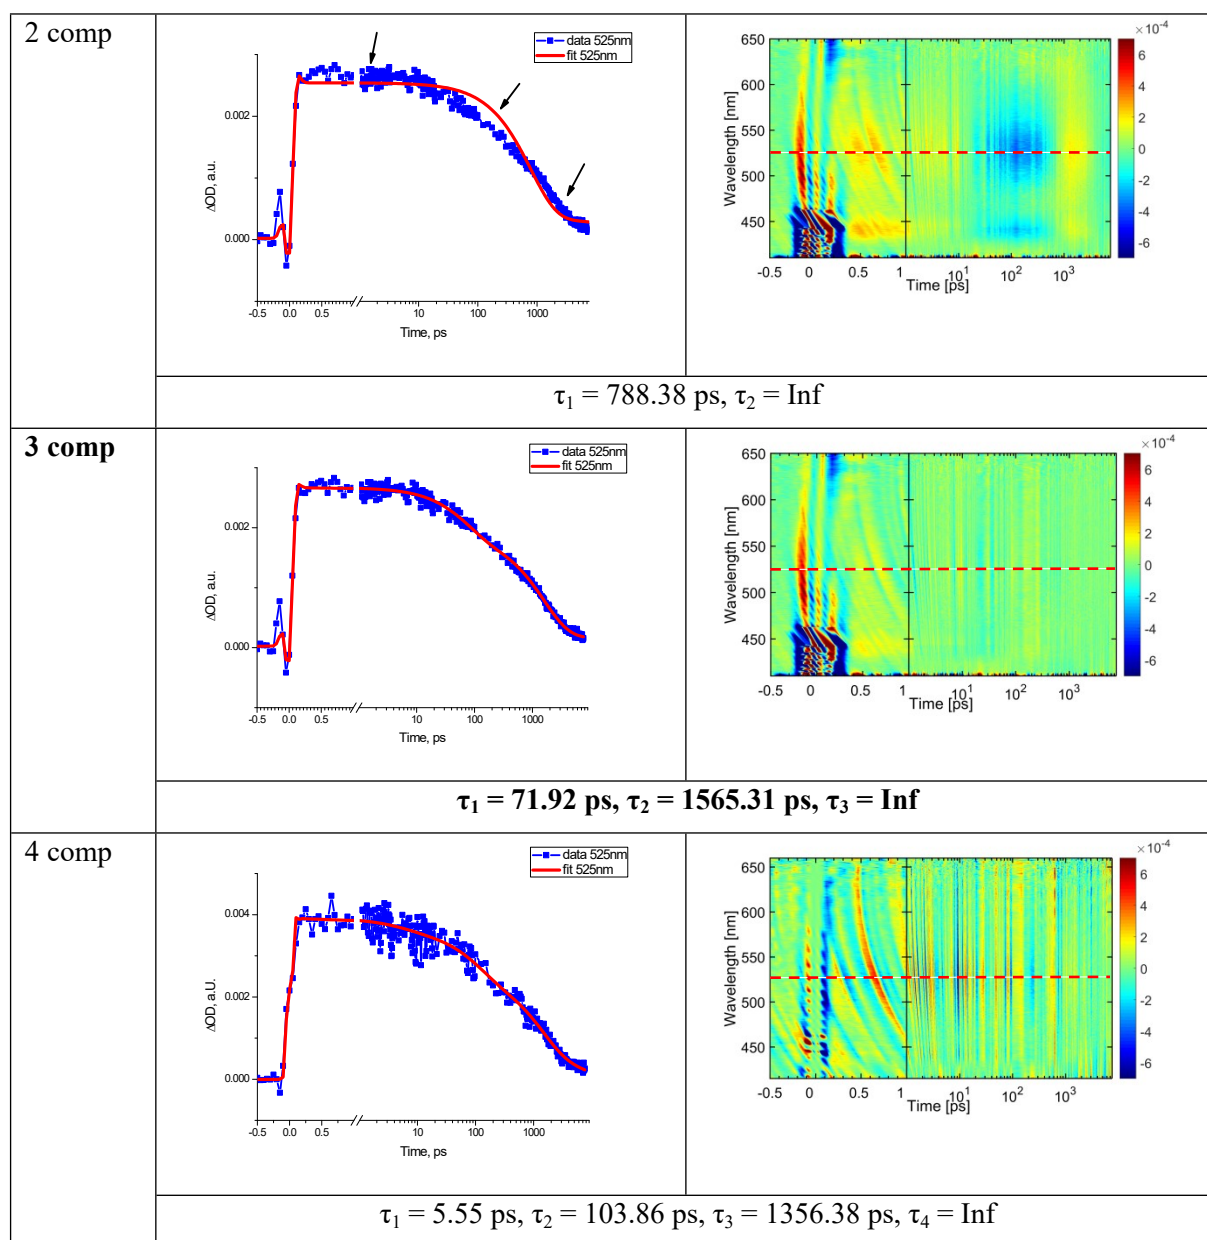

**Figure S19.** Representative time traces (at 525 nm) and fitting curves obtained with an increasing number of time components in the global analysis of the TA 2D maps (left) and the map of residuals (right) of **tBuTPAterpy** in *n*-hexane. Data in the range 445 – 460 nm containing the Raman scattering of the solvent were excluded from the analysis.

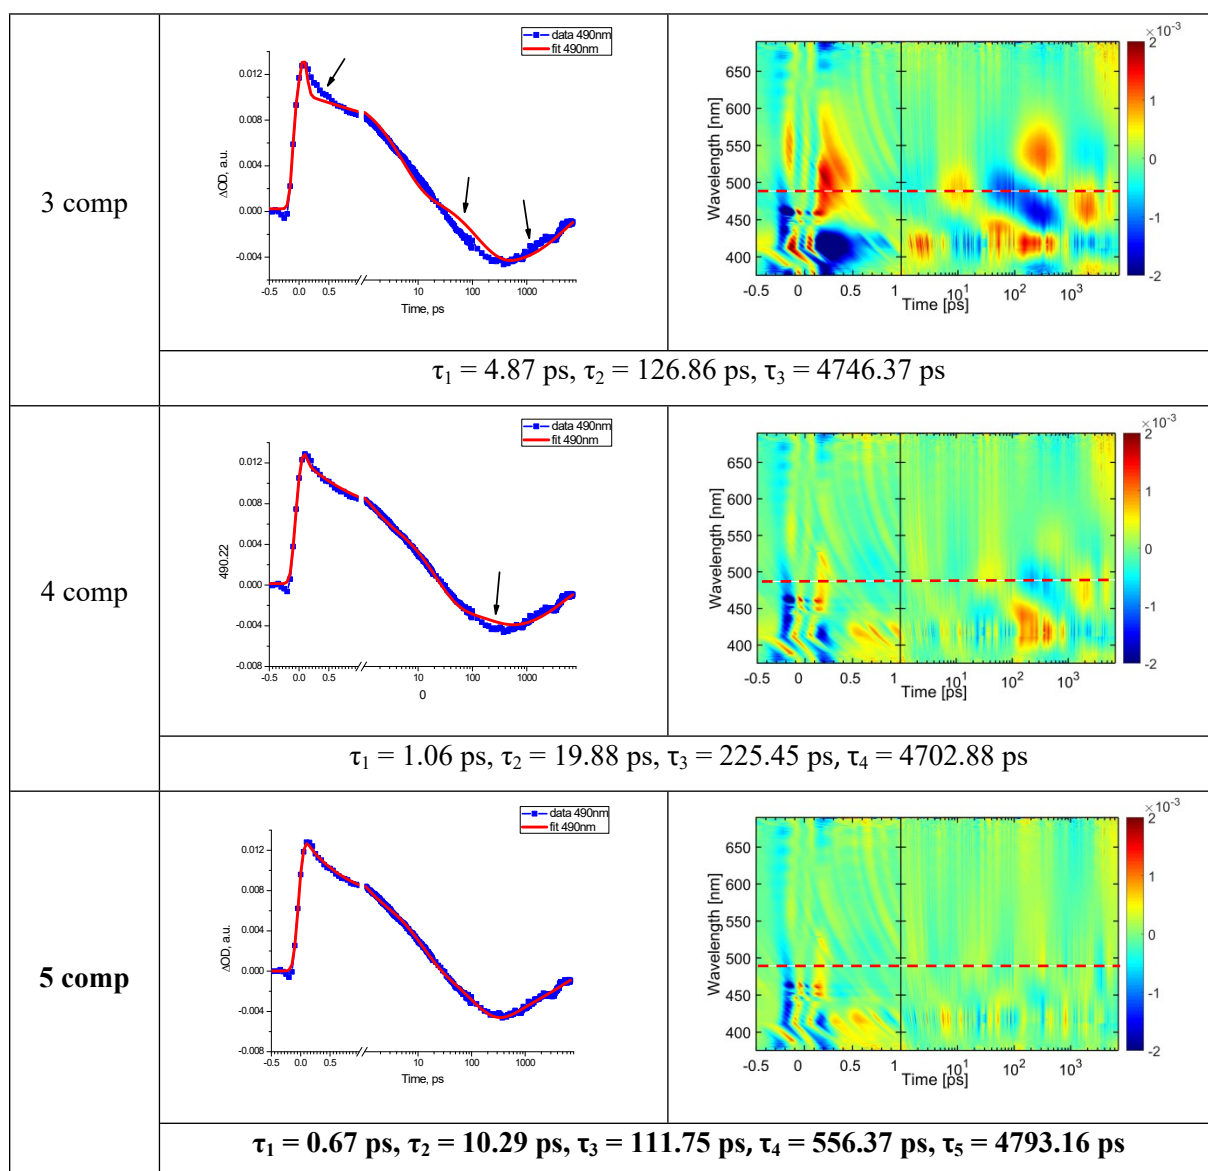

**Figure S20.** Representative time traces (at 490 nm) and fitting curves obtained with an increasing number of time components in the global analysis of the TA 2D maps (left) and the map of residuals (right) of **tBuTPAterpy** in glyceryl triacetate. The spectral range 395 – 410 nm was excluded from the analysis due to pump light scattering.

## References:

1. A. M. Maroń, A. Szłapa-Kula, M. Matussek, R. Kruszyński, M. Siwy, H. Janeczek, J. Grzelak, S. Mackowski, E. Schab-Balcerzak, B. Machura, Photoluminescence enhancement of Re(I) carbonyl complexes bearing D-A and D- $\pi$ -A ligands, *Dalton Transactions*, **2020**, 49, 4441-4453
2. E. Socie, B. R. C. Vale, A. Burgos-Caminal, J.-E. Moser, Direct Observation of Shallow Trap States in Thermal Equilibrium with Band-Edge Excitons in Strongly Confined CsPbBr<sub>3</sub> Perovskite Nanoplatelets. *Advanced Optical Materials*, **2021**, 9, 2001308
3. C. Slavov, H. Hartmann, J. Wachtveitl, Implementation and Evaluation of Data Analysis Strategies for Time-Resolved Optical Spectroscopy. *Anal. Chem.*, **2015**, 87, 2328–2336
4. A. M. Maroń, O. Cannelli, E. C. Socie, P. Lodowski and B. Machura, Push-Pull Effect of Terpyridine Substituted by Triphenylamine Motive—Impact of Viscosity, Polarity and Protonation on Molecular Optical Properties, *Molecules*, 2022, **27**, 7071.
